# Supplementary material for: Photophysical and electrochemical properties of 1,3-bis(2-pyridylimino)isoindolate platinum(ii) derivatives
Source: Royal Society of Chemistry journal article supplement (doi:10.1039/c2dt30354j), 2012-01-01
Supplement: c2dt30354j.pdf [file c2dt30354j.pdf]

Electronic Supplementary Information

**Photophysical and Electrochemical Properties of 1,3-bis(2-pyridylimino)isoindolate Platinum(II) Derivatives**

**Kenneth Hanson,<sup>a</sup> Luke Roskop,<sup>b</sup> Niral Patel,<sup>a</sup> Laurent Griffe,<sup>a</sup> Peter I. Djurovich,<sup>a</sup>  
Mark S. Gordon<sup>b</sup> and Mark E. Thompson<sup>a</sup>**

<sup>a</sup>*Department of Chemistry, University of Southern California, Los Angeles, CA 90089*

<sup>b</sup>*Department of Chemistry, Iowa State University, Ames, Iowa, 50011*

**Contents**

|                                                                                                                                                      |          |
|------------------------------------------------------------------------------------------------------------------------------------------------------|----------|
| 1. <b>Chart 1</b>                                                                                                                                    | Page S3  |
| 2. <b>Figure S1.</b> HOMO and LUMO orbitals and energies for complexes <b>1-12</b> .                                                                 | Page S4  |
| 3. <b>Figure S2.</b> Orbitals, energies and lowest energy vertical excitation of BPI and <b>1</b> .                                                  | Page S5  |
| 4. <b>Figure S3.</b> Room-temperature absorption spectra of complexes <b>1-6</b> (top) and <b>7-12</b> (bottom) in CH <sub>2</sub> Cl <sub>2</sub> . | Page S6  |
| 5. <b>Table S1.</b> The relative intensities and the orbitals involved in the 20 lowest energy transitions of <b>6</b> found by TDDFT.               | Page S7  |
| 6. <b>Figure S4.</b> Room-temperature absorption spectra of complex <b>7</b> in various solvents.                                                    | Page S7  |
| 7. <b>Figure S5.</b> Room-temperature emission spectra of complexes <b>1-5</b> (top) and <b>7-12</b> (bottom) in toluene.                            | Page S8  |
| 8. <b>Figure S6.</b> Room-temperature emission spectra of complex <b>7</b> in various solvents.                                                      | Page S9  |
| 9. <b>Figure S7.</b> Emission spectra of complexes <b>1-6</b> (top) and <b>7-14</b> (bottom) in 2-MeTHF at 77K.                                      | Page S10 |
| 10. <b>Figure S8.</b> CV traces for <b>1</b> and <b>6</b> in CH <sub>2</sub> Cl <sub>2</sub> .                                                       | Page S11 |
| 11. <b>Figure S9.</b> CV traces for <b>1</b> and <b>6</b> in CH <sub>2</sub> Cl <sub>2</sub> .                                                       | Page S11 |
| 12. <b>Figure S10.</b> CV traces for <b>1</b> and <b>6</b> in CH <sub>2</sub> Cl <sub>2</sub> .                                                      | Page S12 |
| 13. <b>Figure S11.</b> CV traces for <b>1</b> and <b>6</b> in CH <sub>2</sub> Cl <sub>2</sub> .                                                      | Page S12 |
| 14. <b>Figure S12.</b> 250MHz <sup>1</sup> H NMR spectra of BPI (CDCl <sub>3</sub> ).                                                                | Page S13 |
| 15. <b>Figure S13.</b> 400 MHz <sup>1</sup> H NMR spectra of complex <b>1</b> (CDCl <sub>3</sub> ).                                                  | Page S13 |
| 16. <b>Figure S14.</b> 400 MHz <sup>1</sup> H (top) and 100 MHz <sup>13</sup> C (bottom) NMR spectra of <b>2</b> (CDCl <sub>3</sub> ).               | Page S14 |
| 17. <b>Figure S15.</b> 400 MHz <sup>1</sup> H (top) and 100 MHz <sup>13</sup> C (bottom) NMR spectra of <b>3</b> (CDCl <sub>3</sub> ).               | Page S15 |
| 18. <b>Figure S16.</b> 400 MHz <sup>1</sup> H (top) and 100 MHz <sup>13</sup> C (bottom) NMR spectra of <b>4</b> (CDCl <sub>3</sub> ).               | Page S16 |
| 19. <b>Figure S17.</b> 400 MHz <sup>1</sup> H (top) and 100 MHz <sup>13</sup> C (bottom) NMR spectra of <b>5</b> (CDCl <sub>3</sub> ).               | Page S17 |

|                                                                                                                                                          |          |
|----------------------------------------------------------------------------------------------------------------------------------------------------------|----------|
| 20. <b>Figure S18.</b> 400 MHz $^1\text{H}$ (top) and 100 MHz $^{13}\text{C}$ (bottom) NMR spectra of <b>6</b> ( $\text{CDCl}_3$ ).                      | Page S18 |
| 21. <b>Figure S19.</b> 250 MHz $^1\text{H}$ NMR spectra of <b>4-t-BuBPI</b> ( $\text{CDCl}_3$ ).                                                         | Page S19 |
| 22. <b>Figure S20.</b> 400 MHz $^1\text{H}$ (top) and 100 MHz $^{13}\text{C}$ (bottom) NMR spectra of <b>7</b> ( $\text{CDCl}_3$ ).                      | Page S20 |
| 23. <b>Figure S21.</b> 250 MHz $^1\text{H}$ NMR spectra of <b>3-NO<sub>2</sub>BPI</b> ( $\text{CDCl}_3$ ).                                               | Page S21 |
| 24. <b>Figure S22.</b> 400 MHz $^1\text{H}$ NMR spectra of <b>8</b> ( $\text{CDCl}_3$ ).                                                                 | Page S21 |
| 25. <b>Figure S23.</b> 250 MHz $^1\text{H}$ NMR spectra of <b>4-NO<sub>2</sub>BPI</b> ( $\text{CDCl}_3$ ).                                               | Page S22 |
| 26. <b>Figure S24.</b> 400 MHz $^1\text{H}$ NMR spectra of <b>9</b> ( $\text{CDCl}_3$ ).                                                                 | Page S22 |
| 27. <b>Figure S25.</b> 250 MHz $^1\text{H}$ NMR spectra of <b>4-OC<sub>5</sub>H<sub>11</sub>BPI</b> ( $\text{CDCl}_3$ ).                                 | Page S23 |
| 28. <b>Figure S26.</b> 400 MHz $^1\text{H}$ (top) and 100 MHz $^{13}\text{C}$ (bottom) NMR spectra of <b>10</b> ( $\text{CDCl}_3$ ).                     | Page S24 |
| 29. <b>Figure S27.</b> 250 MHz $^1\text{H}$ NMR spectra of <b>4-IBPI</b> ( $\text{CDCl}_3$ ).                                                            | Page S25 |
| 30. <b>Figure S28.</b> 400 MHz $^1\text{H}$ NMR spectra of <b>11</b> ( $\text{CDCl}_3$ ).                                                                | Page S25 |
| 31. <b>Figure S29.</b> 250 MHz $^1\text{H}$ NMR spectra of <b>4,5-diClBPI</b> ( $\text{CDCl}_3$ ).                                                       | Page S26 |
| 32. <b>Figure S30.</b> 400 MHz $^1\text{H}$ NMR spectra of <b>12</b> ( $\text{CDCl}_3$ ).                                                                | Page S26 |
| 33. <b>Figure S31.</b> ORTEP diagram of <b>6</b> with atom labels. Selected hydrogen atoms omitted for clarity.                                          | Page S27 |
| 34. <b>Table S2.</b> Crystal data and structure refinement for <b>6</b> .                                                                                | Page S28 |
| 35. <b>Table S3.</b> Atomic coordinates ( $\times 10^4$ ) and equivalent isotropic displacement parameters ( $\text{\AA}^2 \times 10^3$ ) for <b>6</b> . | Page S30 |
| 36. <b>Table S4.</b> Bond lengths [ $\text{\AA}$ ] and angles [ $^\circ$ ] for <b>6</b> .                                                                | Page S32 |
| 37. <b>Table S5.</b> Anisotropic displacement parameters ( $\text{\AA}^2 \times 10^3$ ) for <b>6</b> .                                                   | Page S33 |
| 38. <b>Table S6.</b> Hydrogen coordinates ( $\times 10^4$ ) and isotropic displacement parameters ( $\text{\AA}^2 \times 10^3$ ) for <b>6</b> .          | Page S34 |

**Chart 1**

| 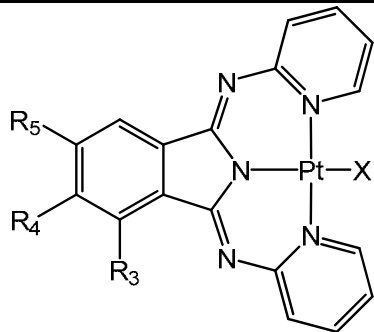 |                    |                 |                                 |                |
|-----------------------------------------------------------------------------------|--------------------|-----------------|---------------------------------|----------------|
| Complex                                                                           | X                  | R <sub>3</sub>  | R <sub>4</sub>                  | R <sub>5</sub> |
| <b>1</b>                                                                          | Cl                 | H               | H                               | H              |
| <b>2</b>                                                                          | F                  | H               | H                               | H              |
| <b>3</b>                                                                          | CN                 | H               | H                               | H              |
| <b>4</b>                                                                          | OOCCH <sub>3</sub> | H               | H                               | H              |
| <b>5</b>                                                                          | Ph                 | H               | H                               | H              |
| <b>6</b>                                                                          | PhNMe <sub>2</sub> | H               | H                               | H              |
| <b>7</b>                                                                          | Cl                 | H               | t-Bu                            | H              |
| <b>8</b>                                                                          | Cl                 | NO <sub>2</sub> | H                               | H              |
| <b>9</b>                                                                          | Cl                 | H               | NO <sub>2</sub>                 | H              |
| <b>10</b>                                                                         | Cl                 | H               | OC <sub>5</sub> H <sub>11</sub> | H              |
| <b>11</b>                                                                         | Cl                 | H               | I                               | H              |
| <b>12</b>                                                                         | Cl                 | H               | Cl                              | Cl             |

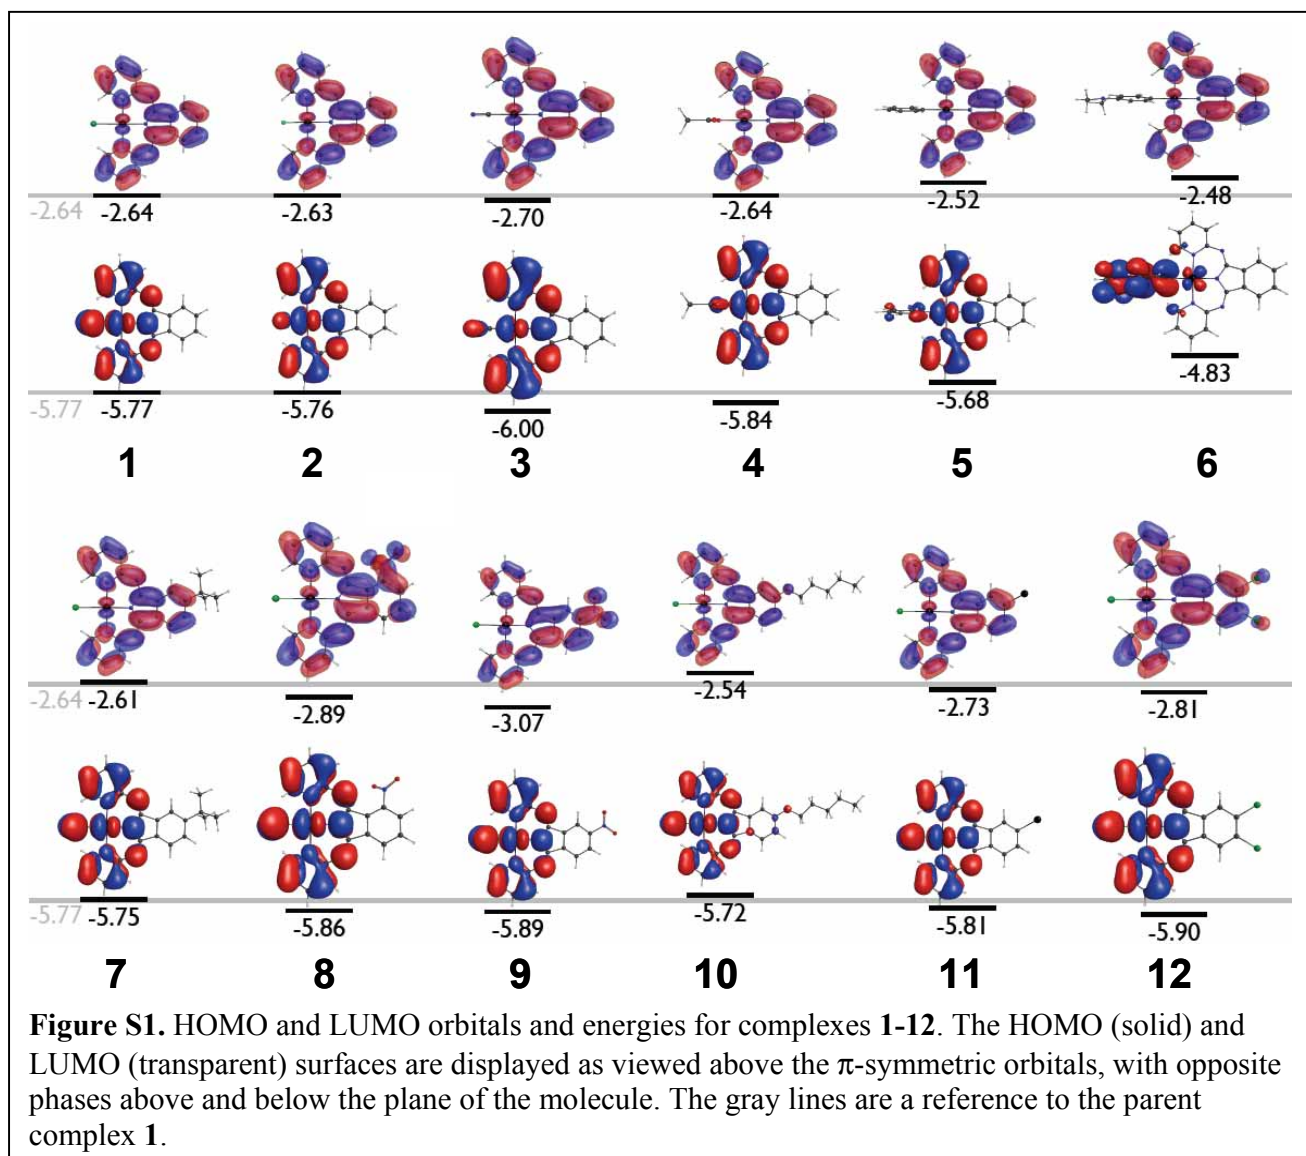

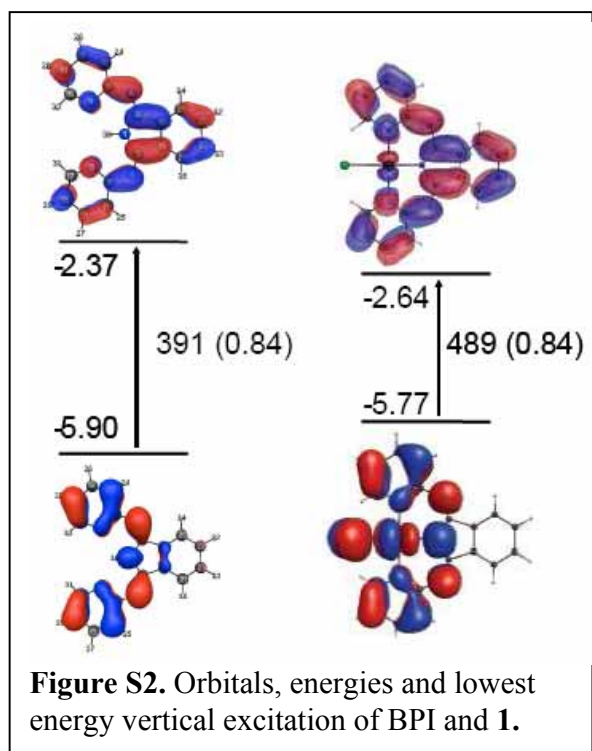

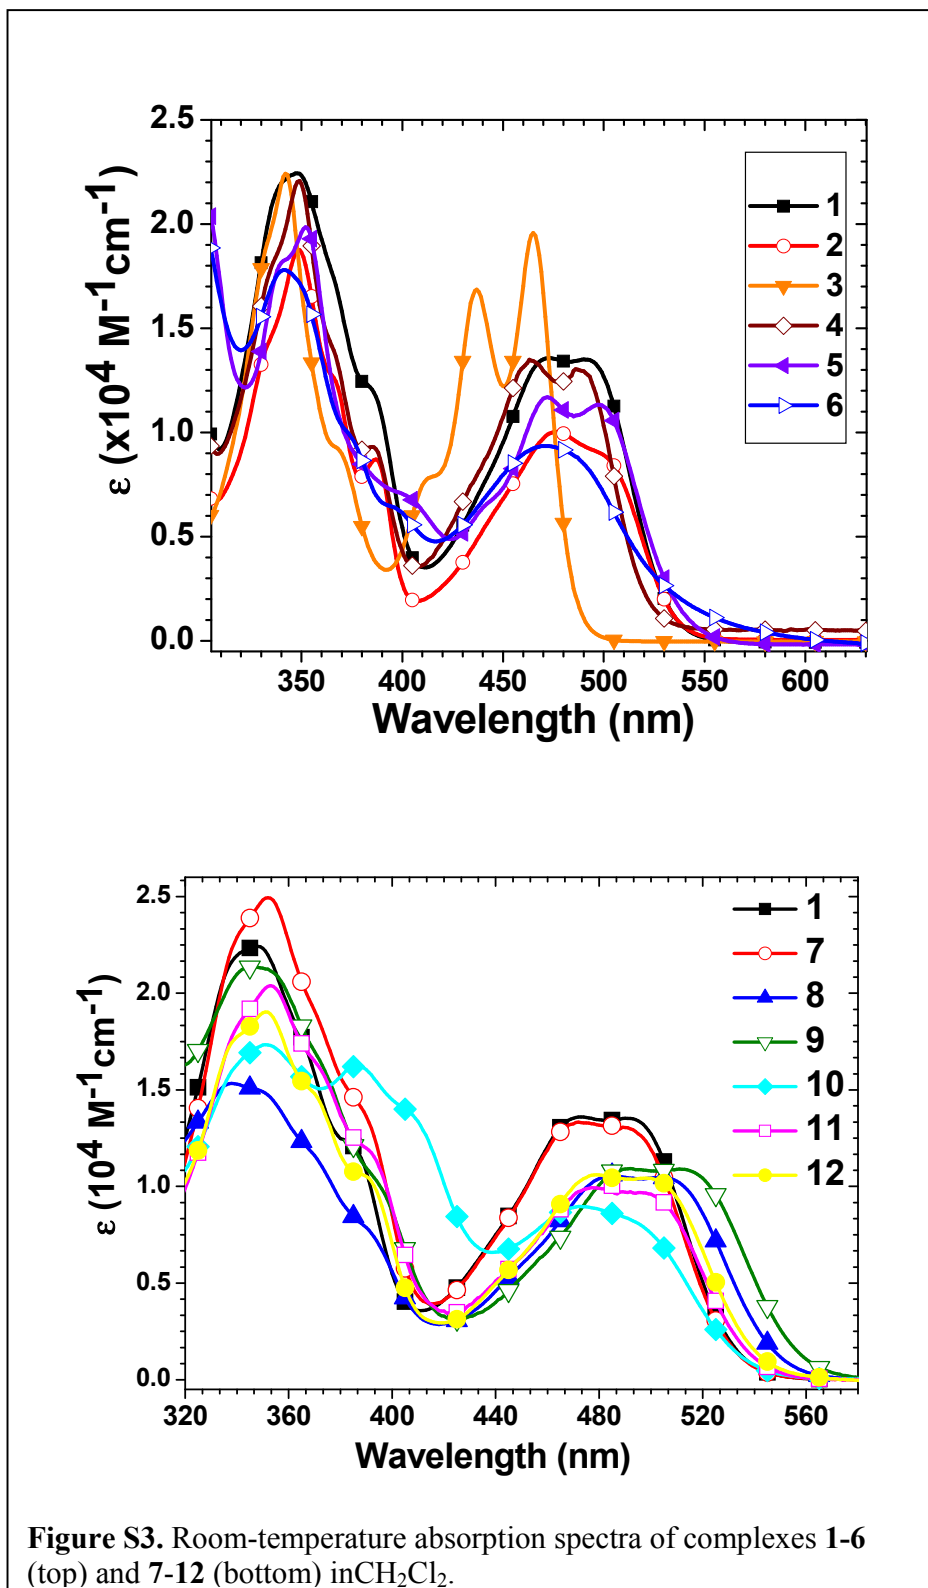

**Figure S3.** Room-temperature absorption spectra of complexes 1-6 (top) and 7-12 (bottom) in  $\text{CH}_2\text{Cl}_2$ .

**Table S1.** The relative intensities and the orbitals involved in the 20 lowest energy transitions of **6** found by TDDFT.

| Transition | Energy (nm) | Dominant Contributor (square of the amplitude) | Relative intensity |
|------------|-------------|------------------------------------------------|--------------------|
| 1          | 661         | HOMO → LUMO (1.00)                             | 7.31E-04           |
| 2          | 476         | HOMO-1 → LUMO (0.81)                           | 0.23364            |
| 3          | 431         | HOMO-2 → LUMO (0.99)                           | 2.10E-05           |
| 4          | 419         | HOMO → LUMO+1 (0.99)                           | 4.50E-04           |
| 5          | 374         | HOMO → LUMO+2 (0.53)<br>HOMO-4 → LUMO (0.39)   | 0.10901            |
| 6          | 372         | HOMO-4 → LUMO (0.45)<br>HOMO → LUMO+2 (0.45)   | 0.17091            |
| 7          | 371         | HOMO-3 → LUMO (0.74)                           | 0.124              |
| 8          | 352         | HOMO-5 → LUMO (0.82)                           | 0.00487            |
| 9          | 351         | HOMO-7 → LUMO (0.79)                           | 0.00137            |
| 10         | 350         | HOMO → LUMO+3 (0.95)                           | 0.00458            |
| 11         | 335         | HOMO-1 → LUMO+1 (0.89)                         | 0.05926            |
| 12         | 329         | HOMO-6 → LUMO (0.87)                           | 0.29268            |
| 13         | 315         | HOMO → LUMO+6 (0.82)                           | 0.00791            |
| 14         | 311         | HOMO-8 → LUMO (0.67)                           | 7.22E-04           |
| 15         | 308         | HOMO-2 → LUMO+1 (0.98)                         | 9.61E-04           |
| 16         | 306         | HOMO-1 → LUMO+2 (0.83)                         | 0.01336            |
| 17         | 305         | HOMO-9 → LUMO (0.64)                           | 0.00284            |
| 18         | 300         | HOMO → LUMO+4 (0.96)                           | 1.60E-05           |
| 19         | 297         | HOMO-10 → LUMO (0.87)                          | 7.68E-04           |
| 20         | 295         | HOMO → LUMO+5 (0.77)                           | 0.02447            |

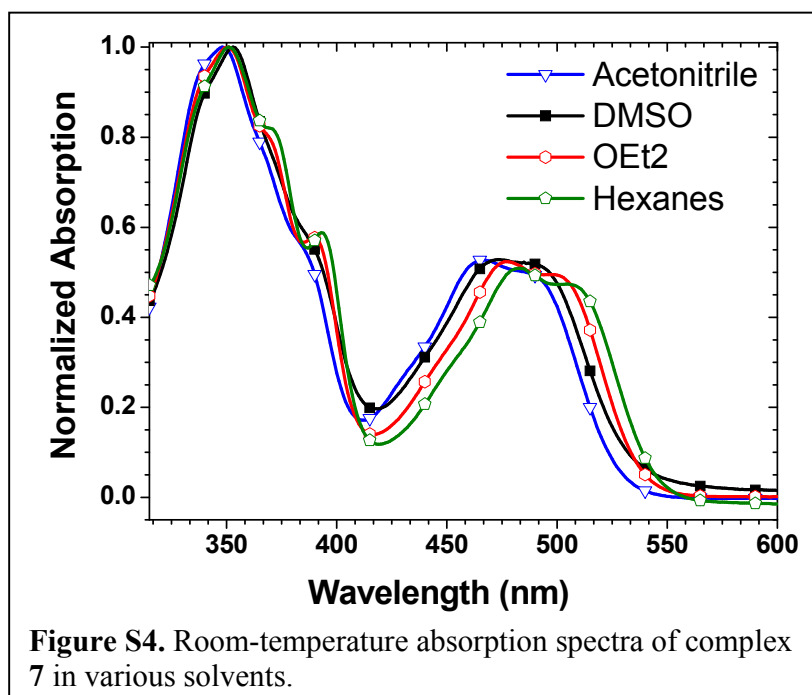

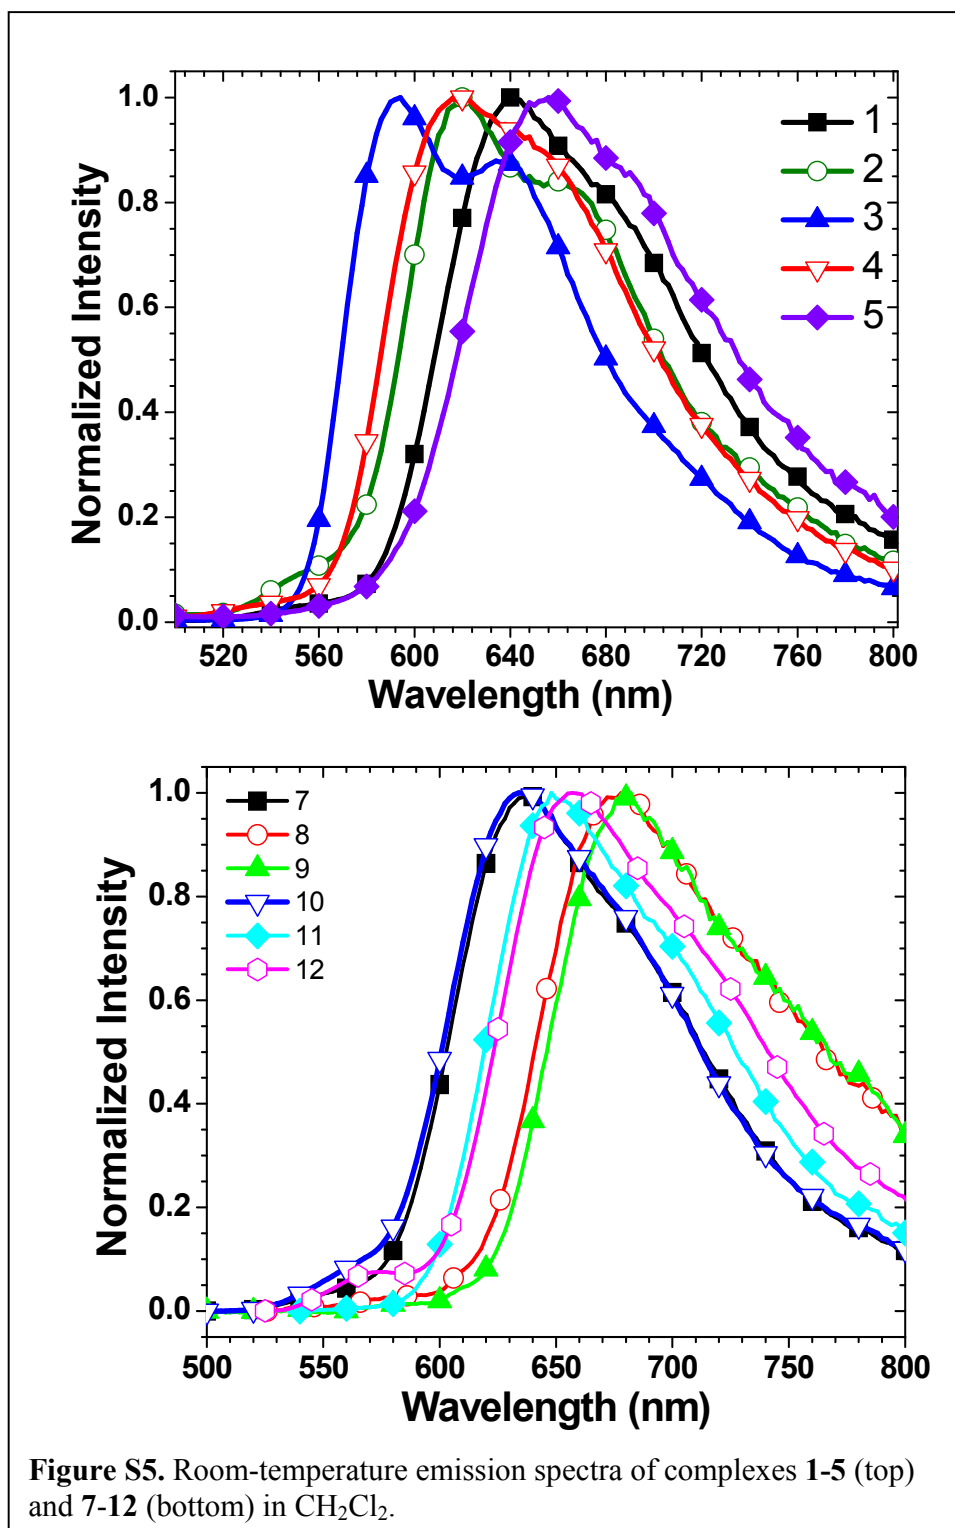



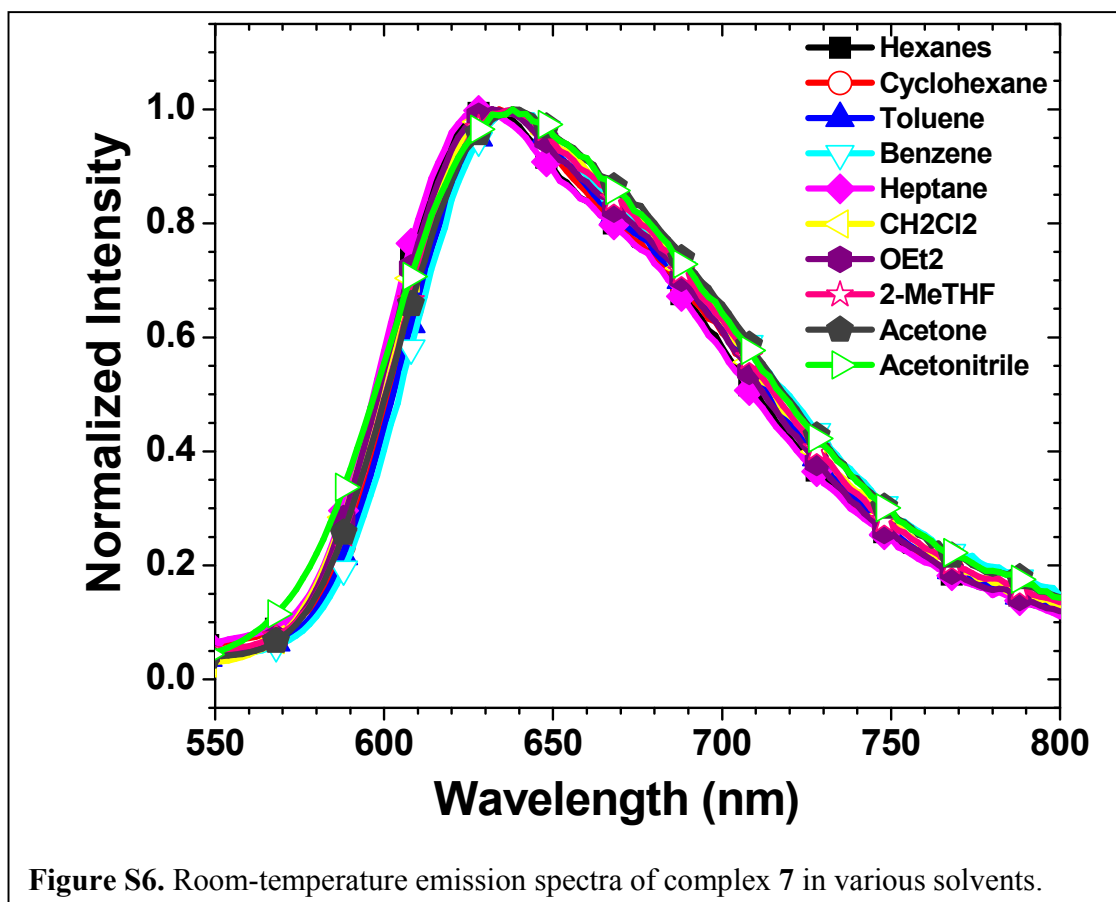

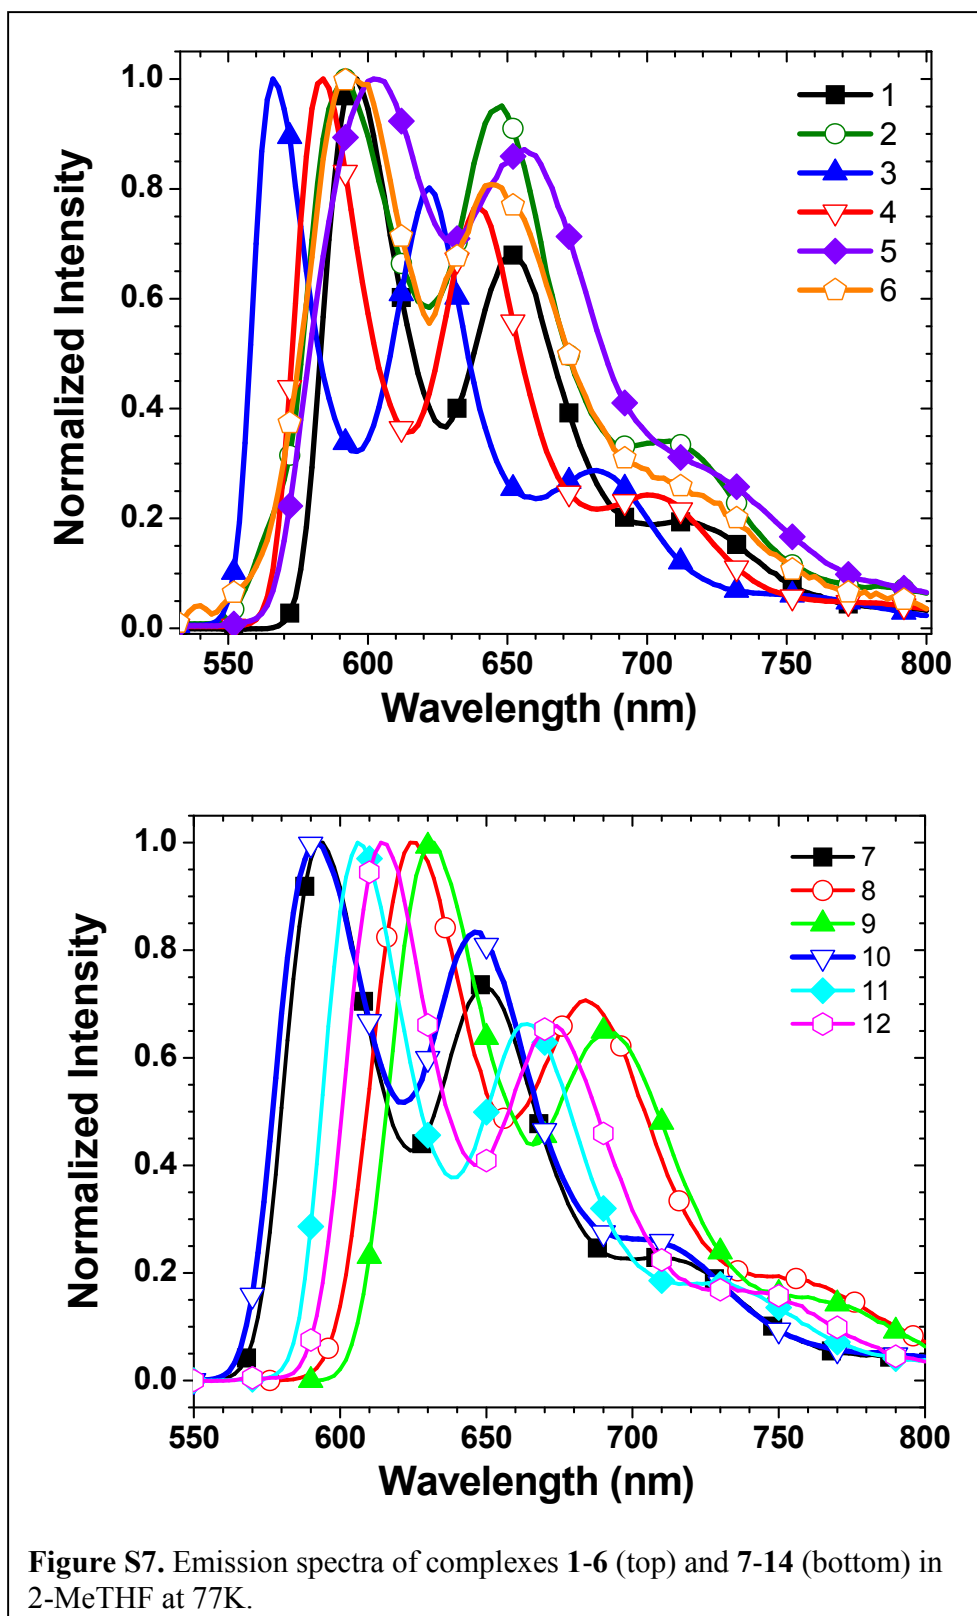

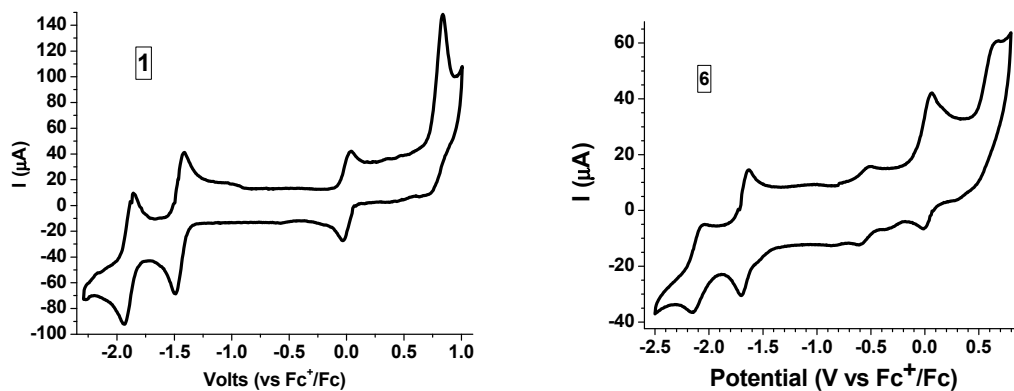

**Figure S8.** CV traces for **1** and **6** in  $\text{CH}_2\text{Cl}_2$ .

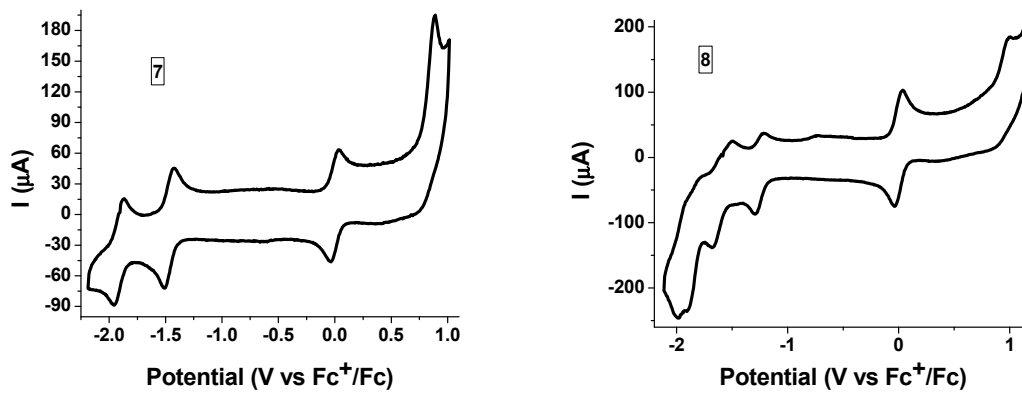

**Figure S9.** CV traces for **7** and **8** in  $\text{CH}_2\text{Cl}_2$ .

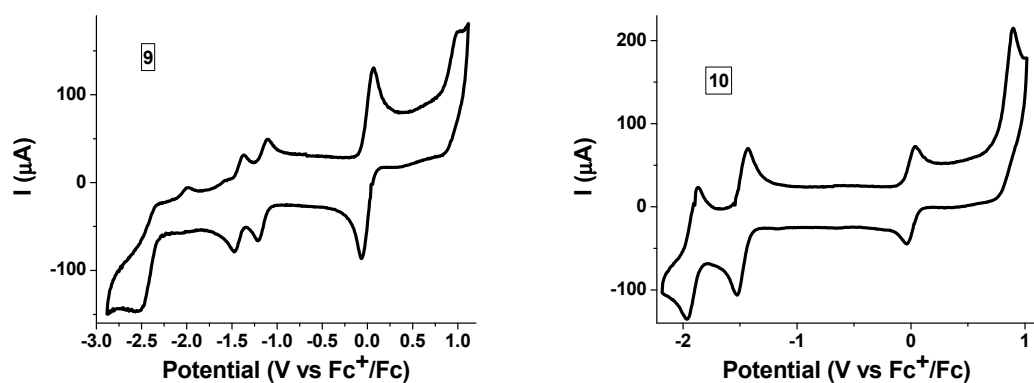

Figure S10. CV traces for 9 and 10 in  $\text{CH}_2\text{Cl}_2$ .

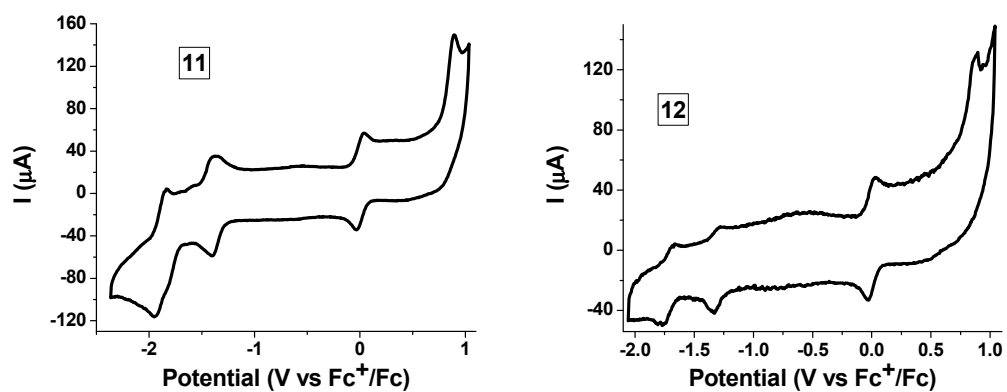

Figure S11. CV traces for 11 and 12 in  $\text{CH}_2\text{Cl}_2$ .

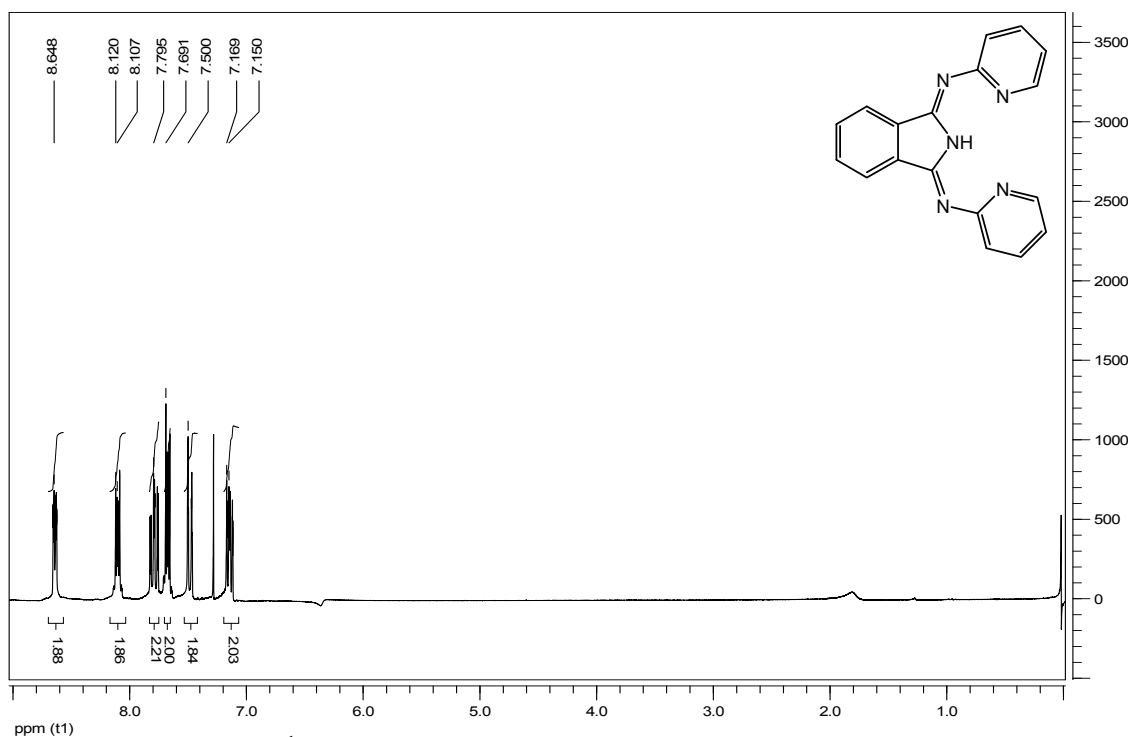

**Figure S12.** 250MHz  $^1\text{H}$  NMR spectra of BPI ( $\text{CDCl}_3$ ).

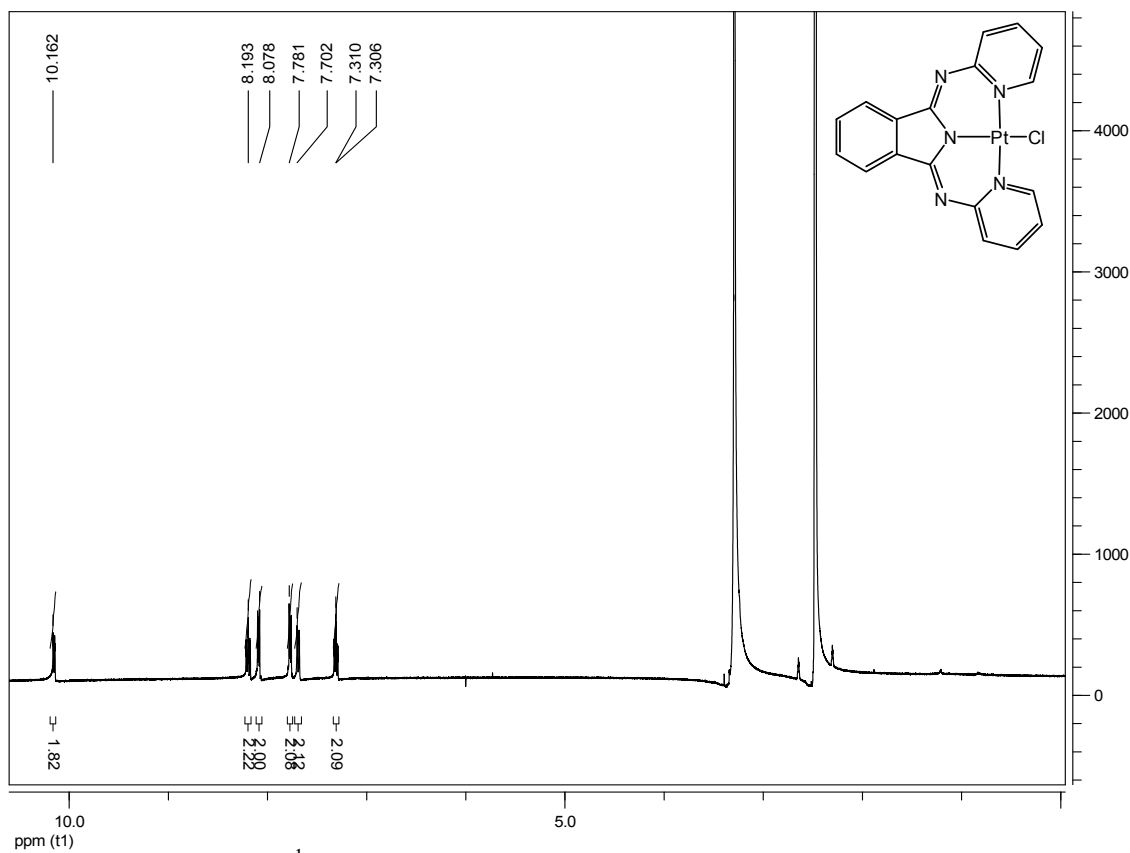

**Figure S13.** 400 MHz  $^1\text{H}$  NMR spectra of complex **1** ( $\text{CDCl}_3$ ).

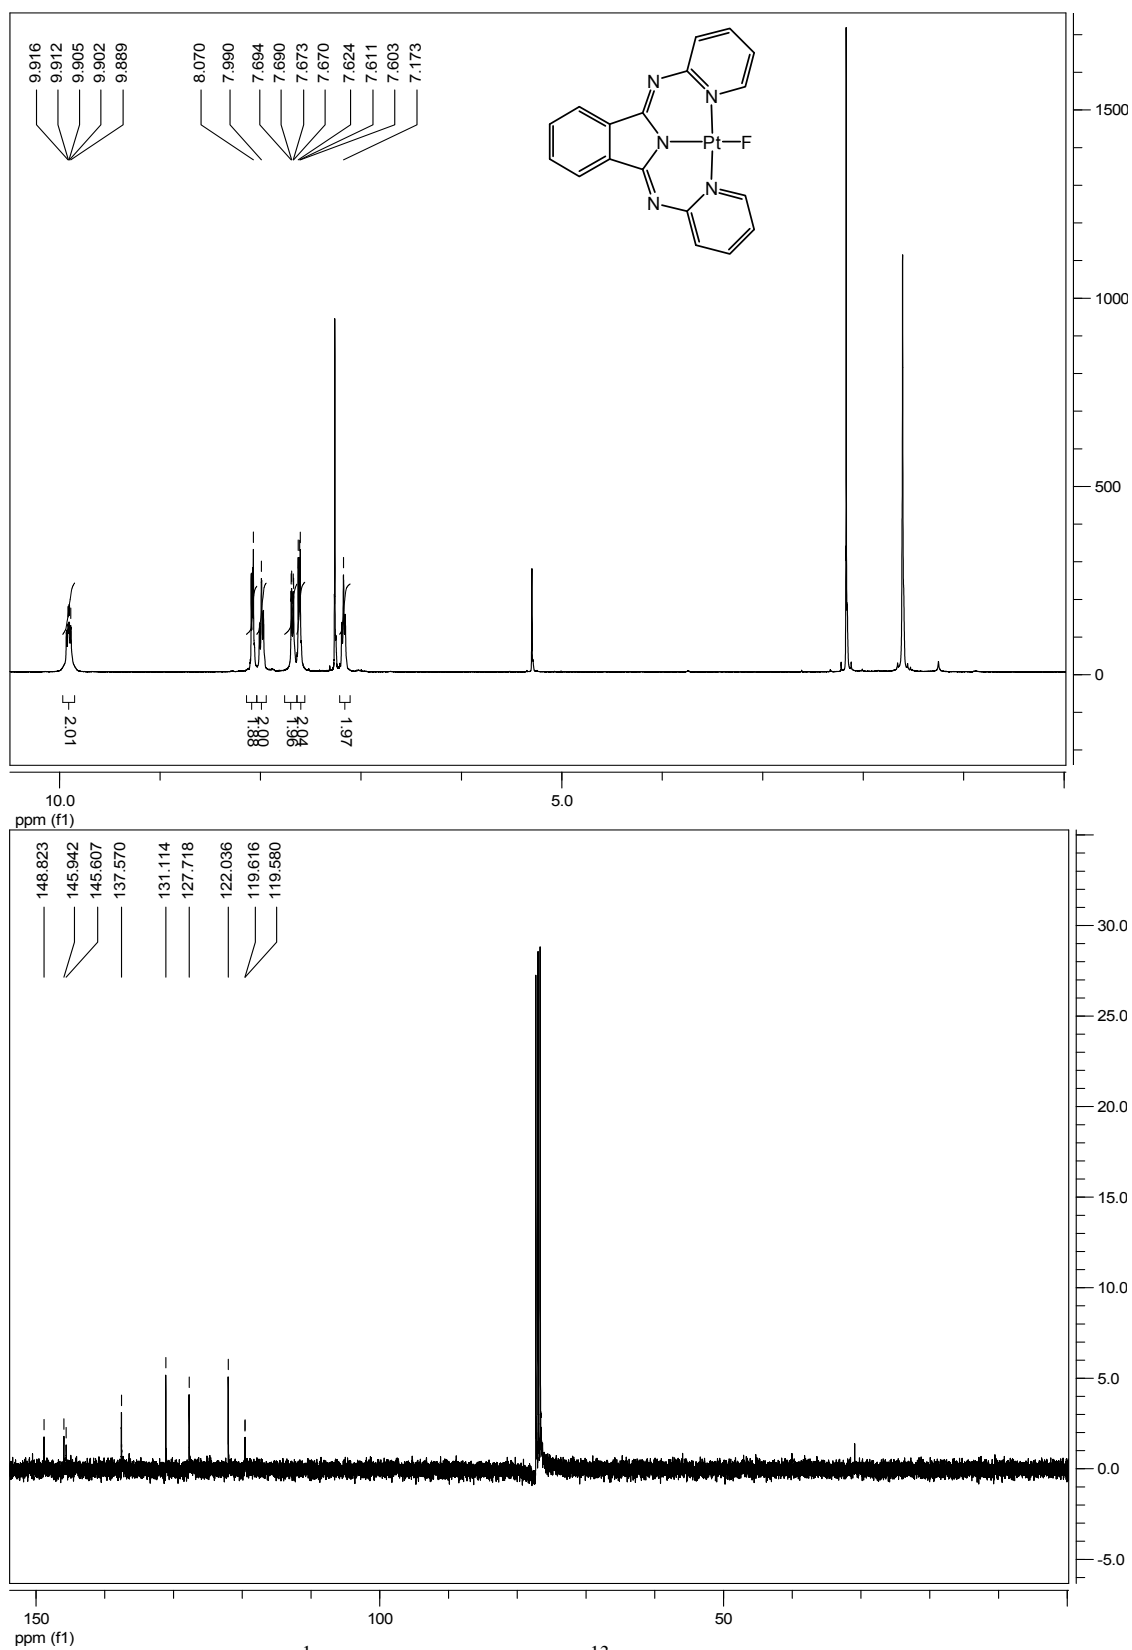

**Figure S14.** 400 MHz <sup>1</sup>H (top) and 100 MHz <sup>13</sup>C (bottom) NMR spectra of **2** (CDCl<sub>3</sub>).

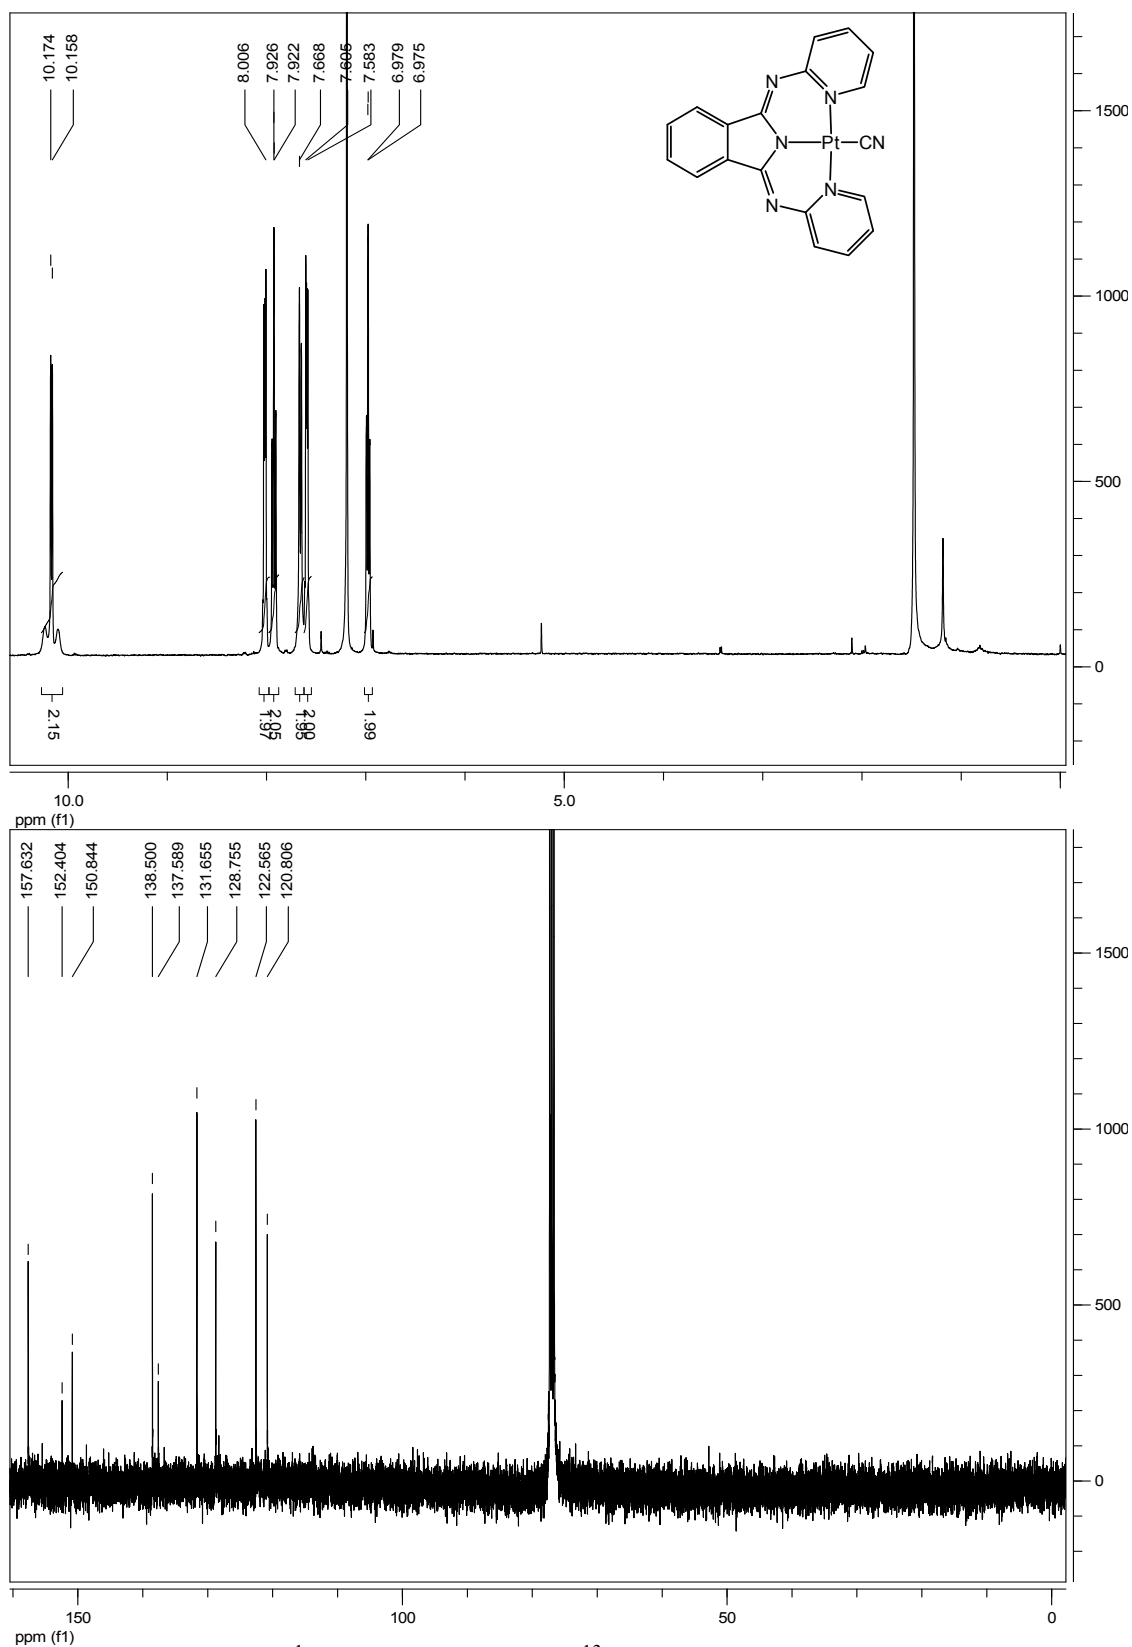

**Figure S15.** 400 MHz  $^1\text{H}$  (top) and 100 MHz  $^{13}\text{C}$  (bottom) NMR spectra of **3** ( $\text{CDCl}_3$ ).

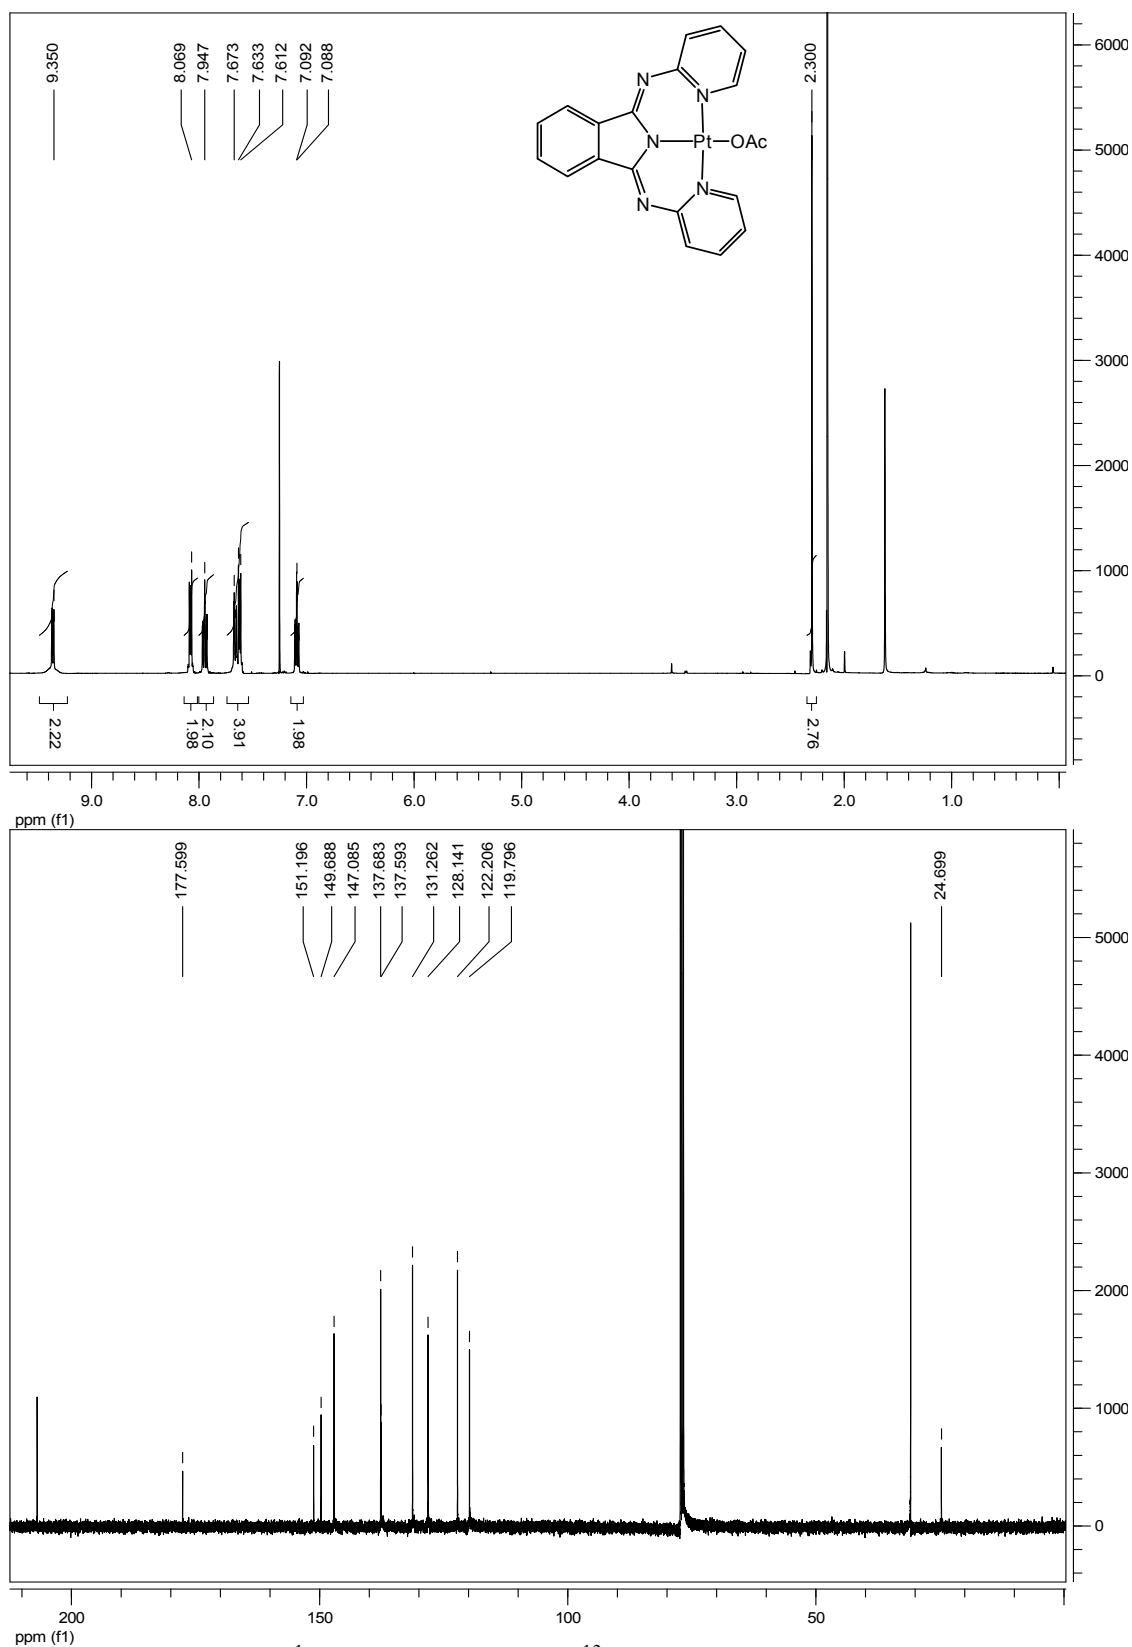

**Figure S16.** 400 MHz  $^1\text{H}$  (top) and 100 MHz  $^{13}\text{C}$  (bottom) NMR spectra of 4 ( $\text{CDCl}_3$ ).



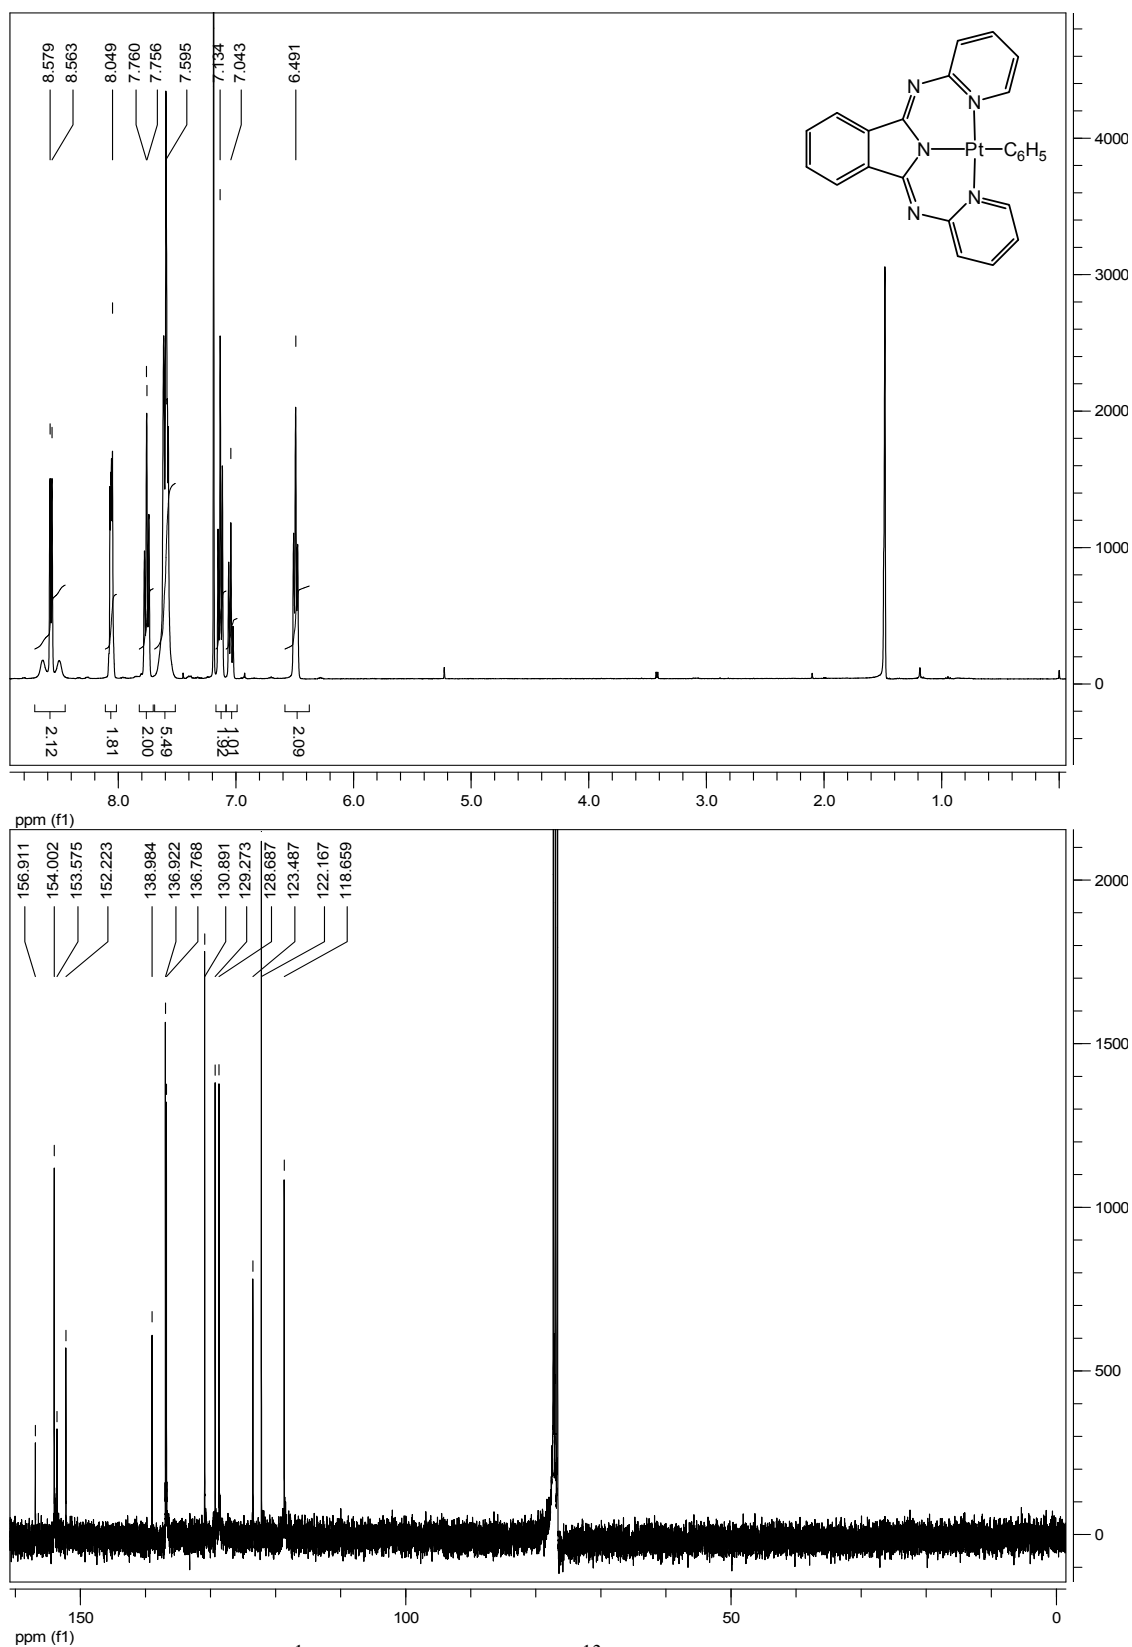

**Figure S17.** 400 MHz  $^1\text{H}$  (top) and 100 MHz  $^{13}\text{C}$  (bottom) NMR spectra of **5** ( $\text{CDCl}_3$ ).

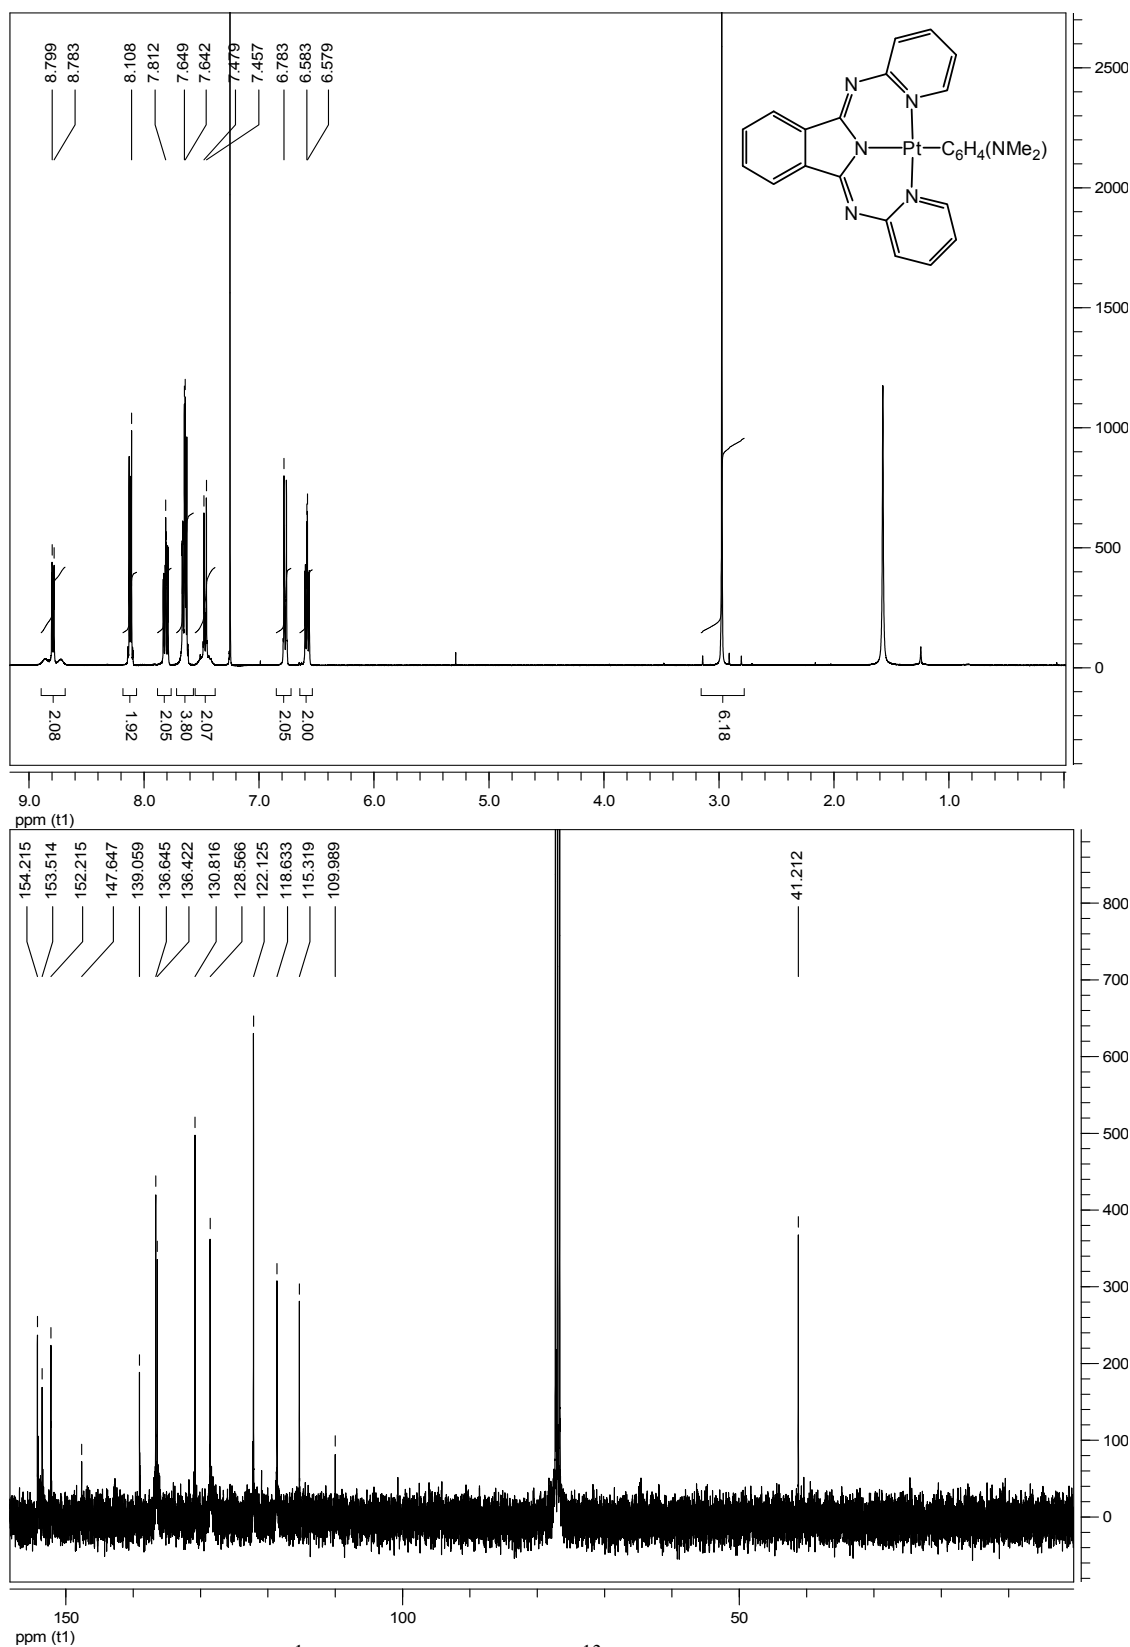

**Figure S18.** 400 MHz  $^1\text{H}$  (top) and 100 MHz  $^{13}\text{C}$  (bottom) NMR spectra of **6** ( $\text{CDCl}_3$ ).

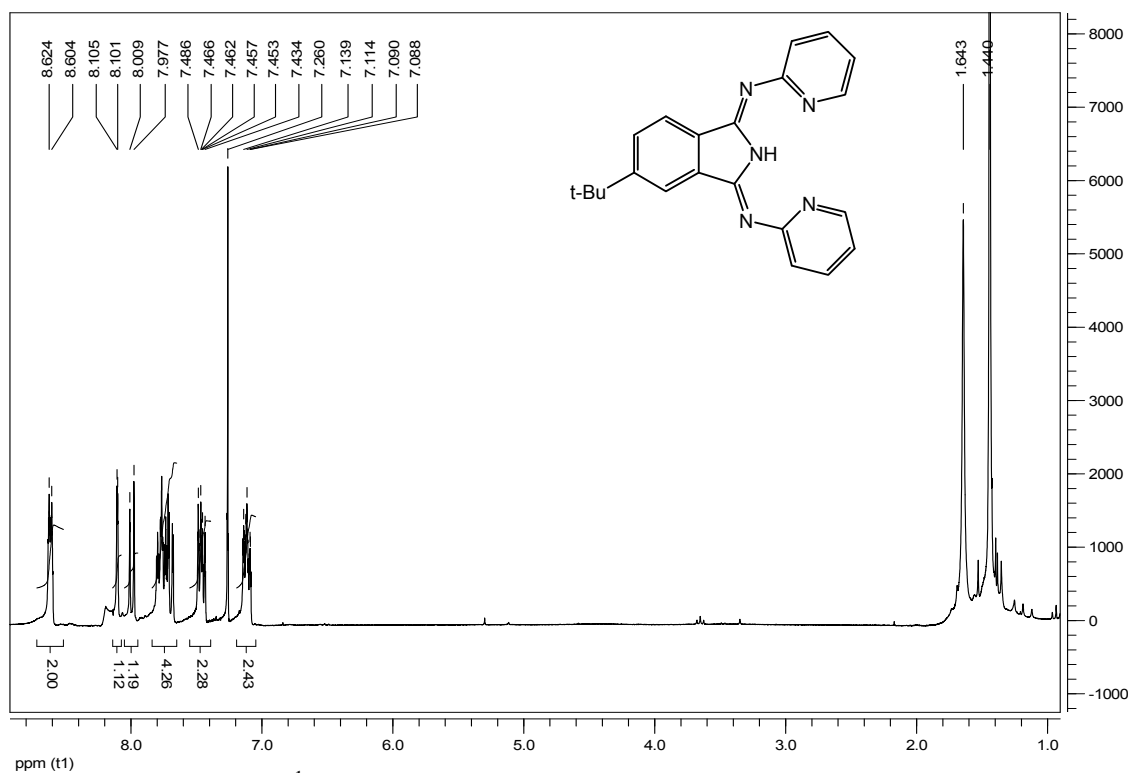

**Figure S19.** 250 MHz <sup>1</sup>H NMR spectra of 4-t-BuBPI (CDCl<sub>3</sub>).

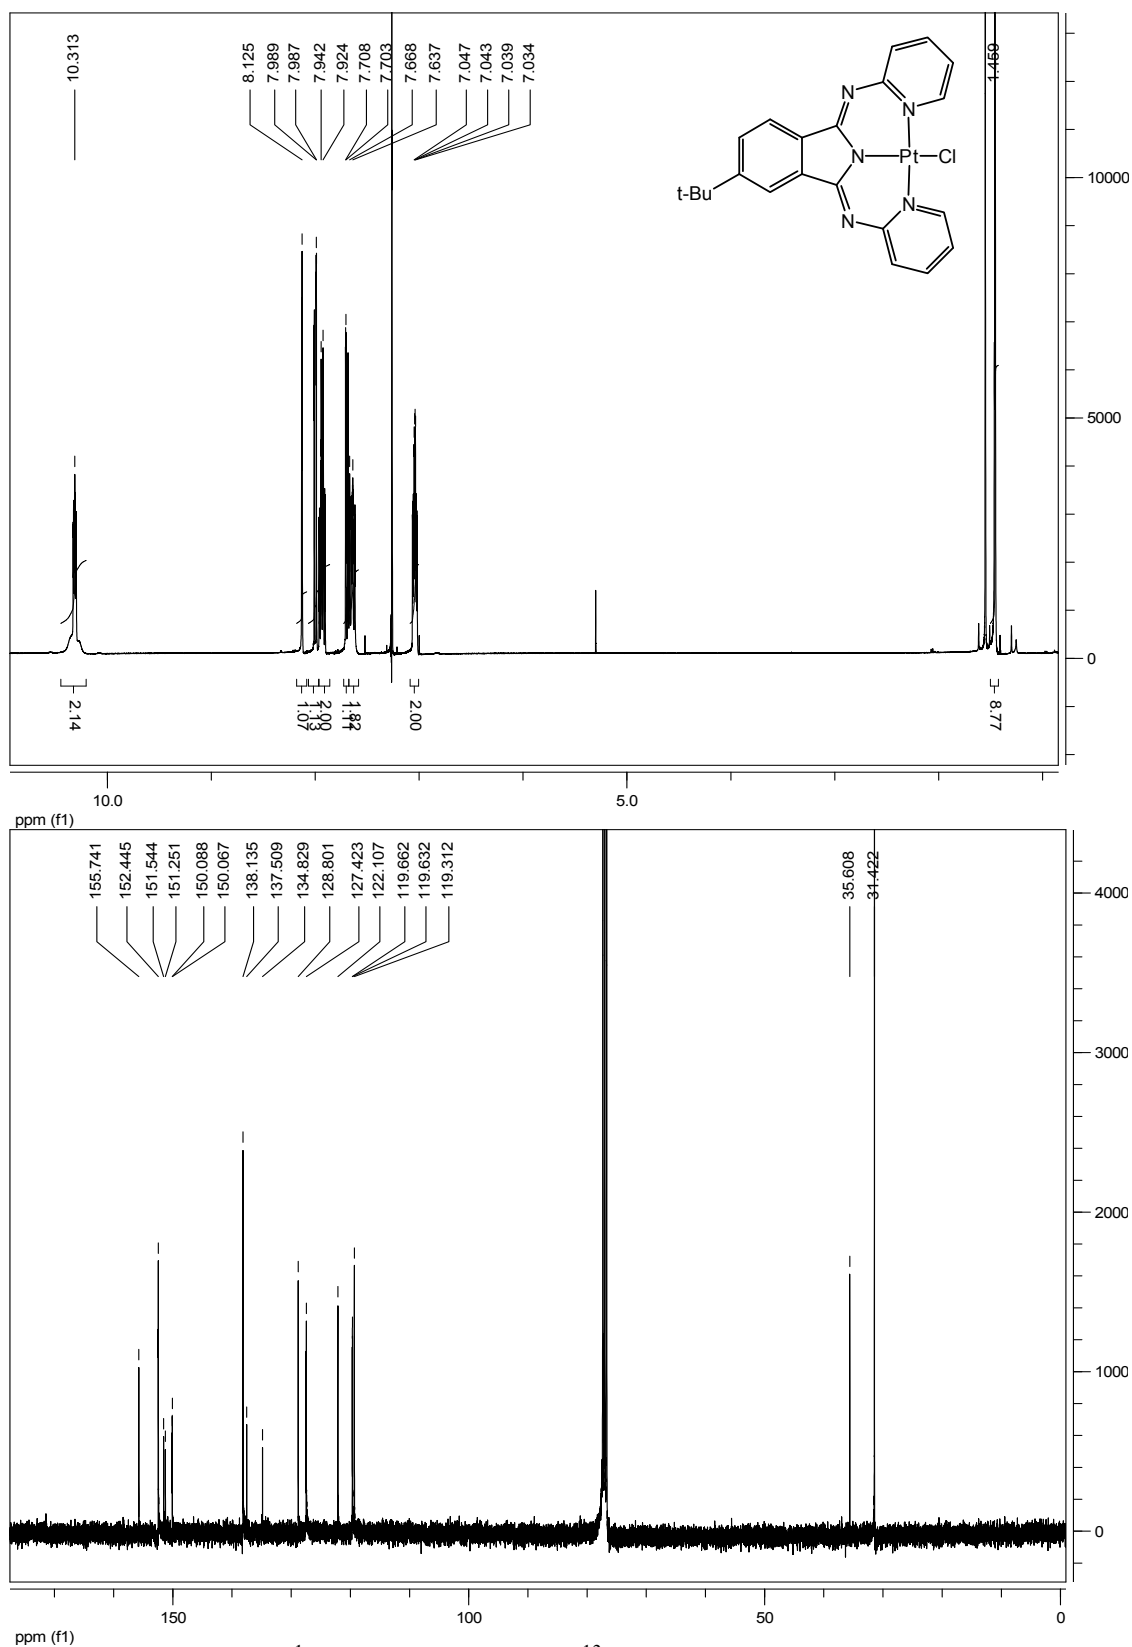

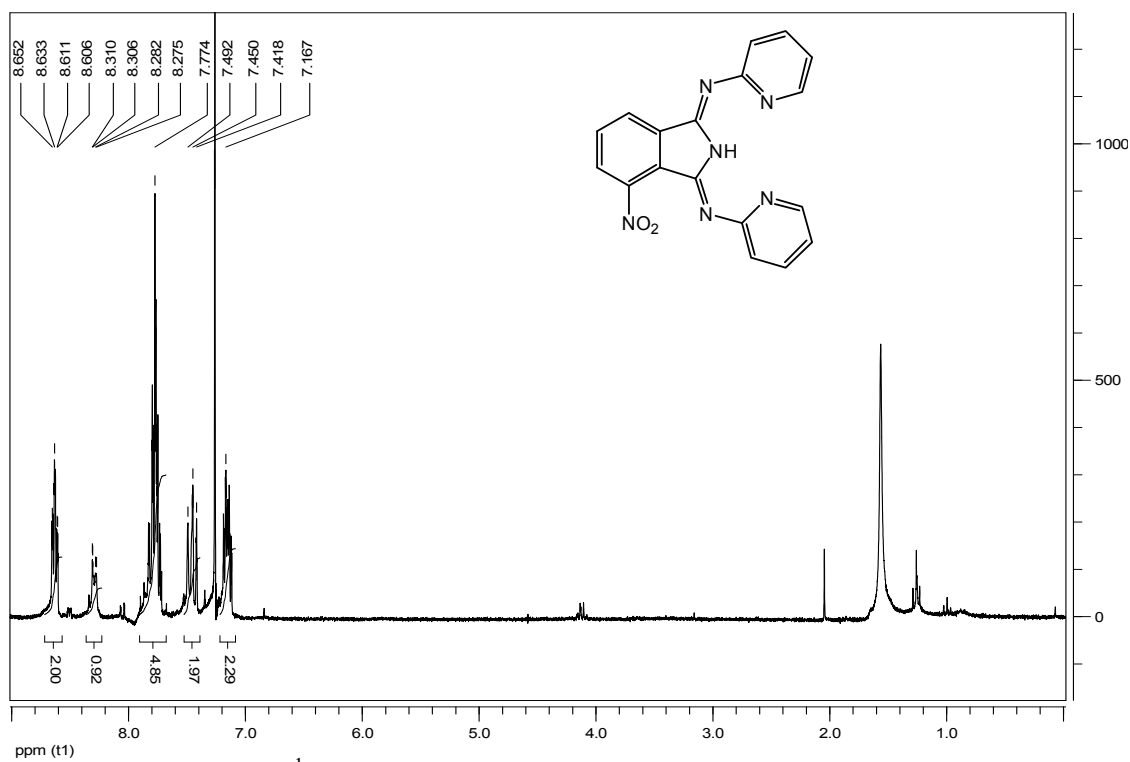

Figure S21. 250 MHz <sup>1</sup>H NMR spectra of 3-NO<sub>2</sub>BPI (CDCl<sub>3</sub>).

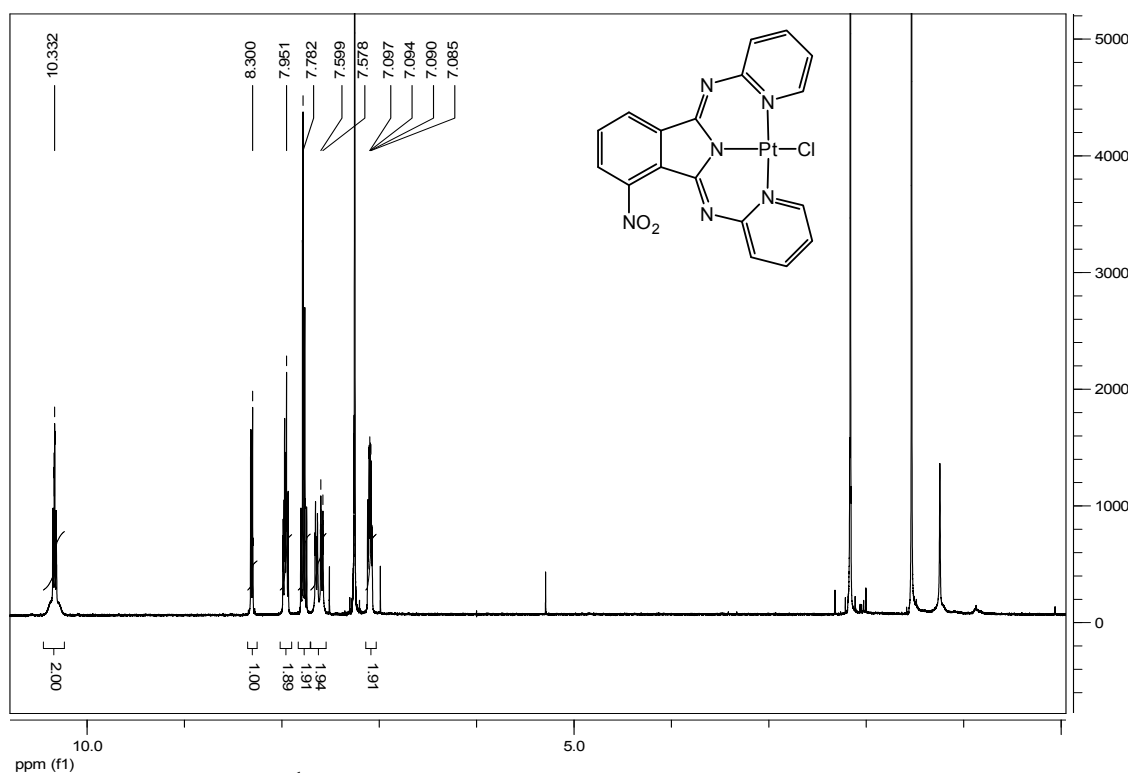

Figure S22. 400 MHz <sup>1</sup>H NMR spectra of 8 (CDCl<sub>3</sub>).

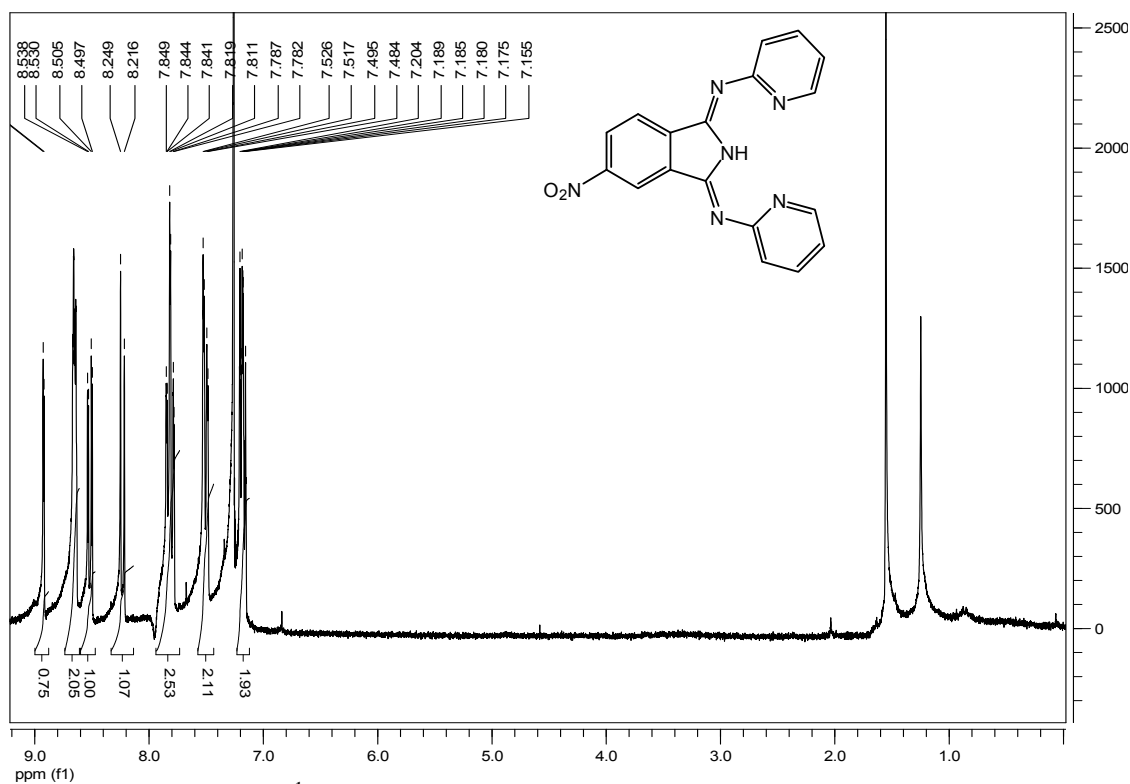

**Figure S23.** 250 MHz <sup>1</sup>H NMR spectra of 4-NO<sub>2</sub>BPI (CDCl<sub>3</sub>).

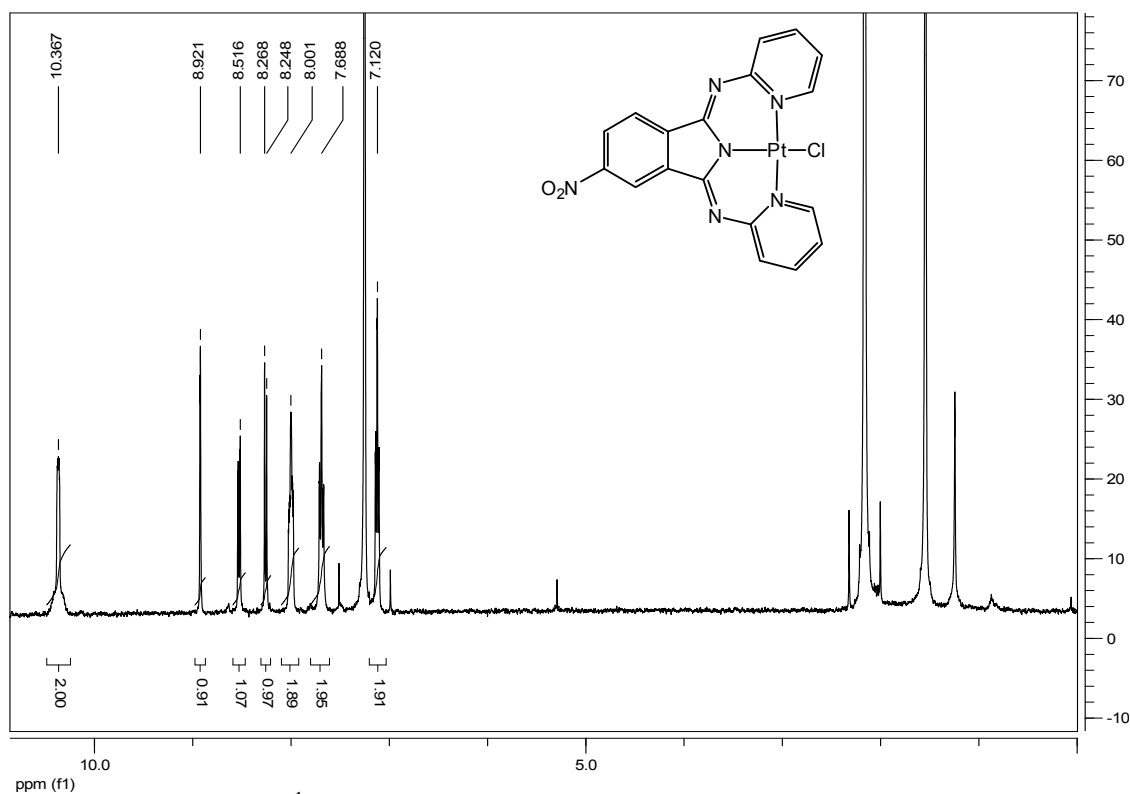

**Figure S24.** 400 MHz <sup>1</sup>H NMR spectra of 9 (CDCl<sub>3</sub>).

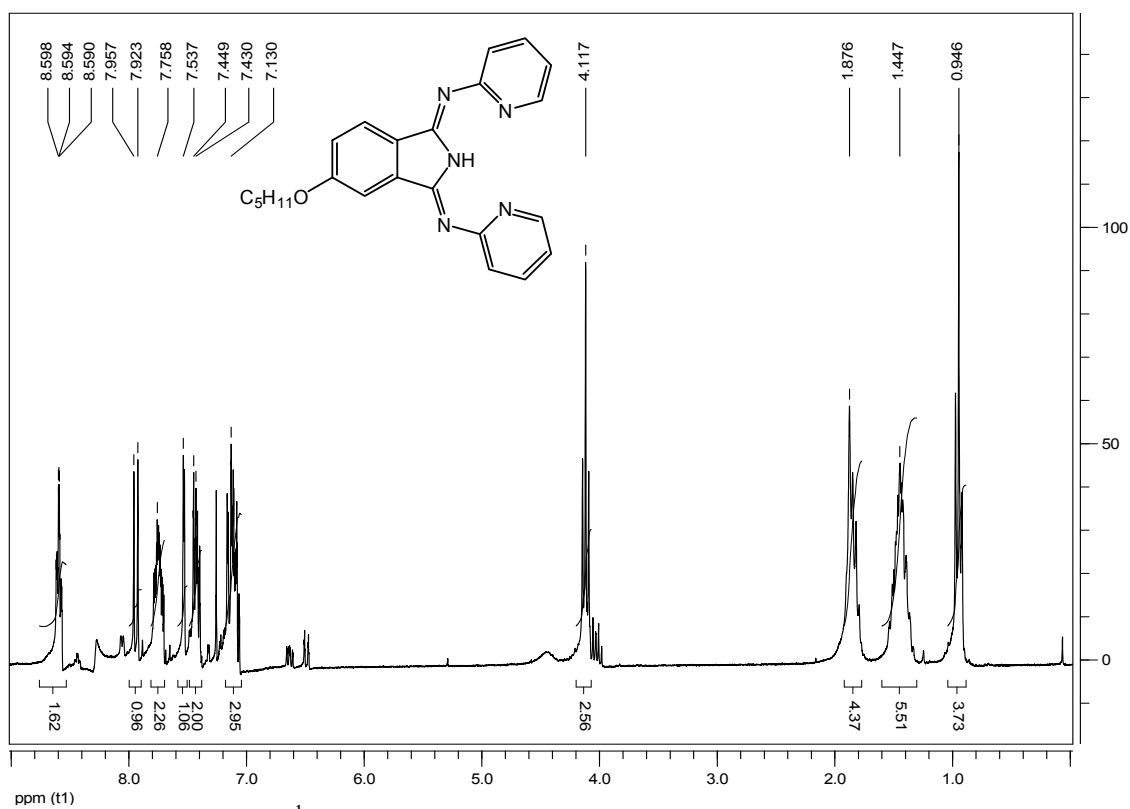

**Figure S25.** 250 MHz <sup>1</sup>H NMR spectra of 4-OC<sub>5</sub>H<sub>11</sub>BPI (CDCl<sub>3</sub>).

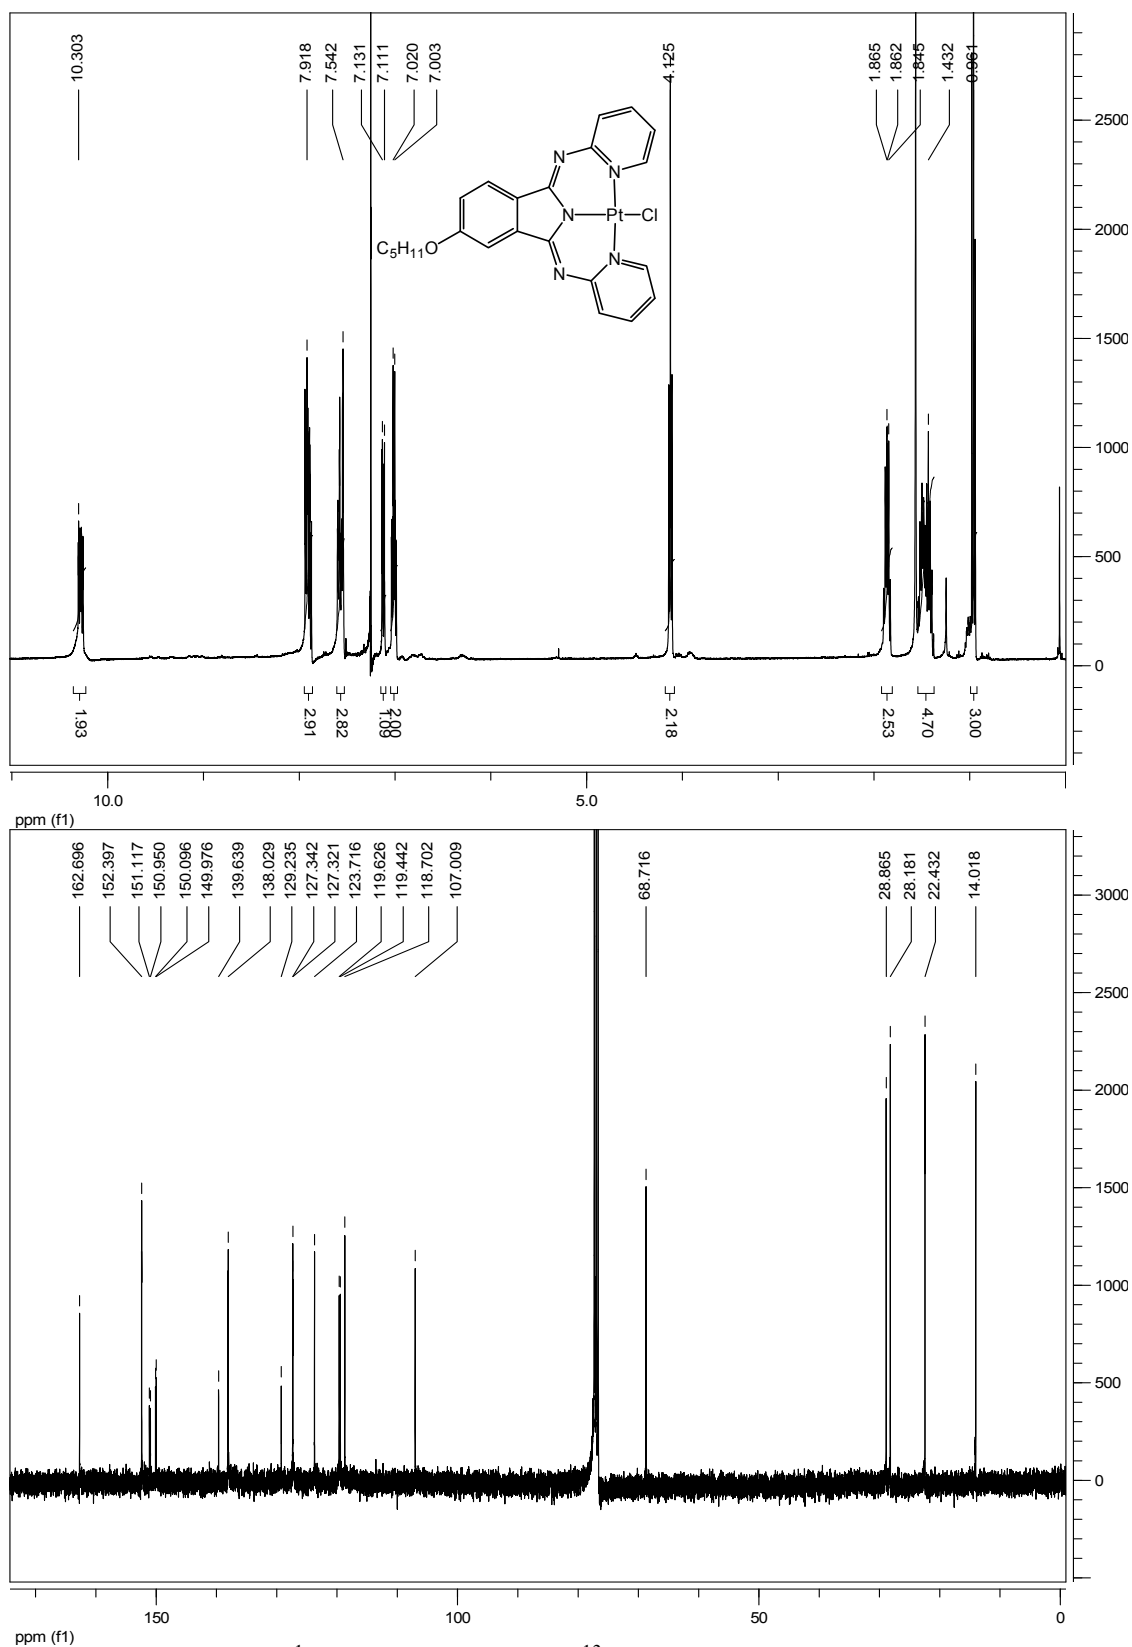

**Figure S26.** 400 MHz  $^1\text{H}$  (top) and 100 MHz  $^{13}\text{C}$  (bottom) NMR spectra of **10** ( $\text{CDCl}_3$ ).



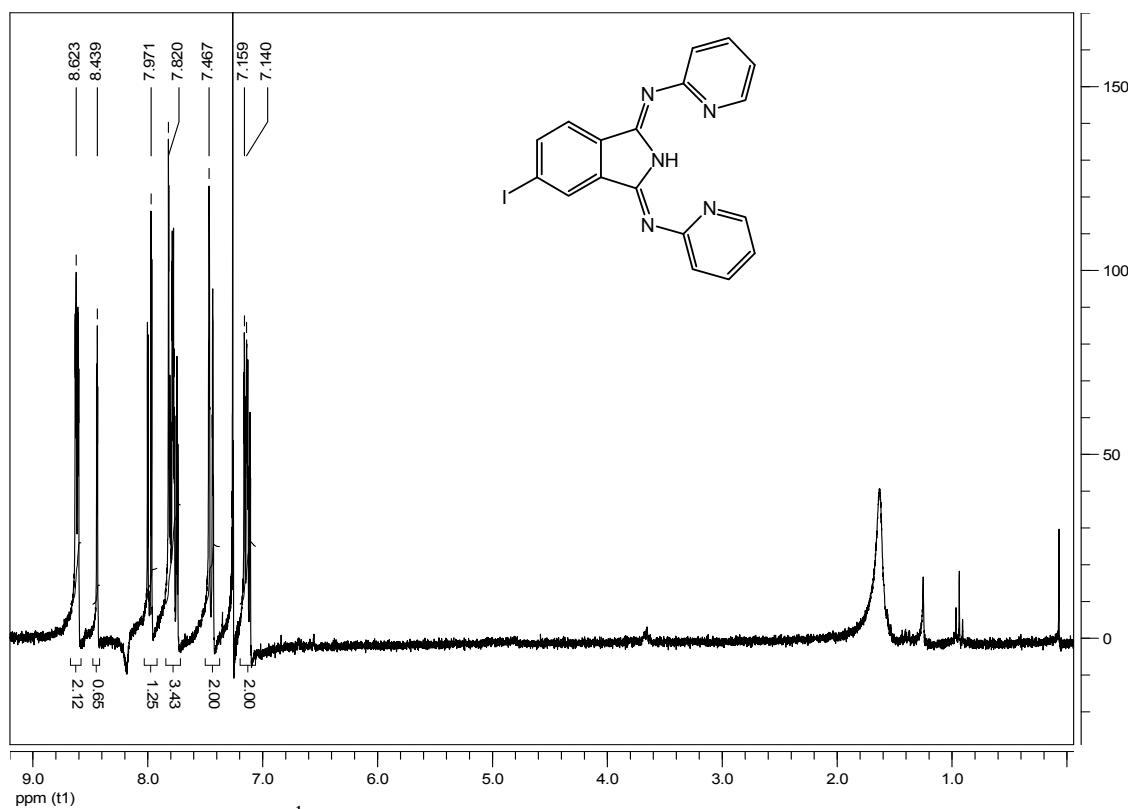

Figure S27. 250 MHz  $^1\text{H}$  NMR spectra of 4-IBPI ( $\text{CDCl}_3$ ).

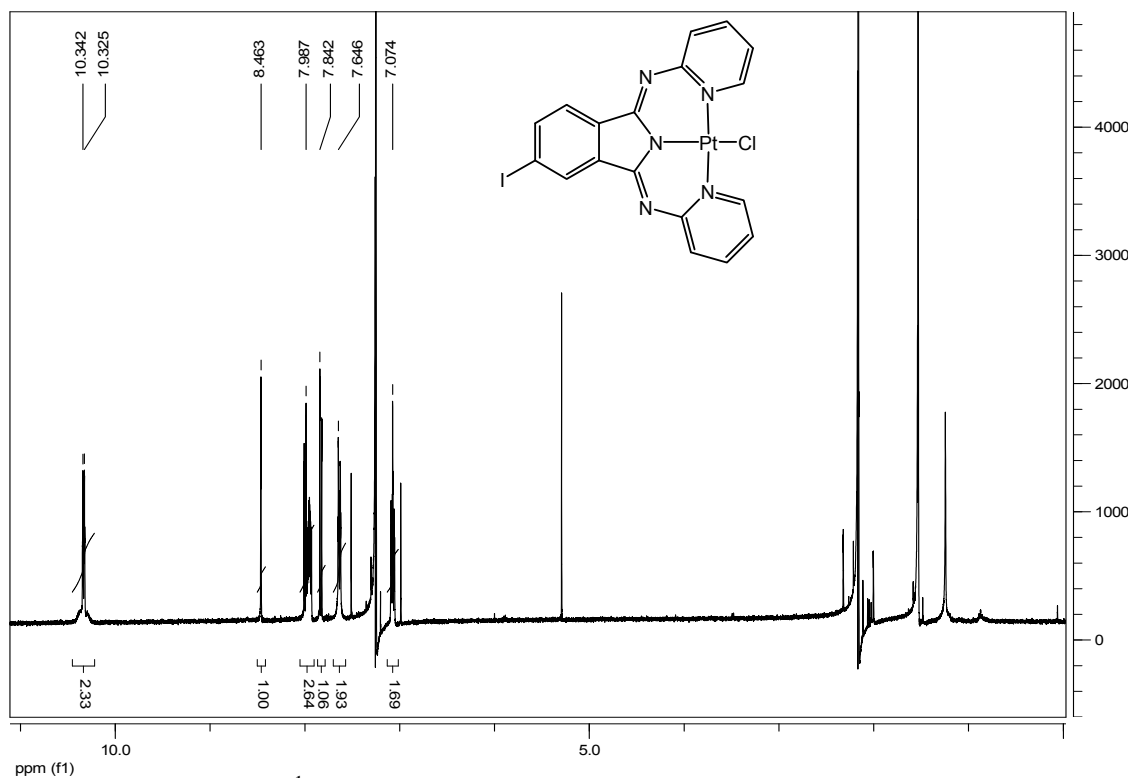

Figure S28. 400 MHz  $^1\text{H}$  NMR spectra of 11 ( $\text{CDCl}_3$ ).

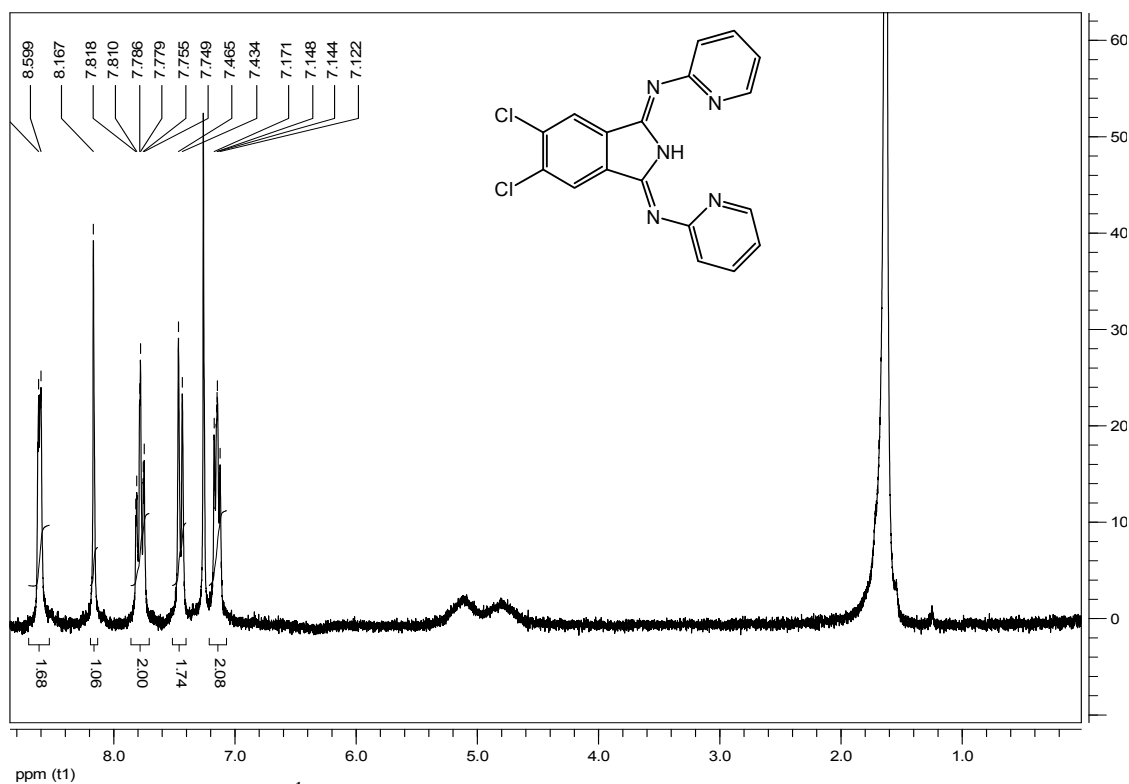

**Figure S29.** 250 MHz  $^1\text{H}$  NMR spectra of **4,5-diCIBPI** ( $\text{CDCl}_3$ ).

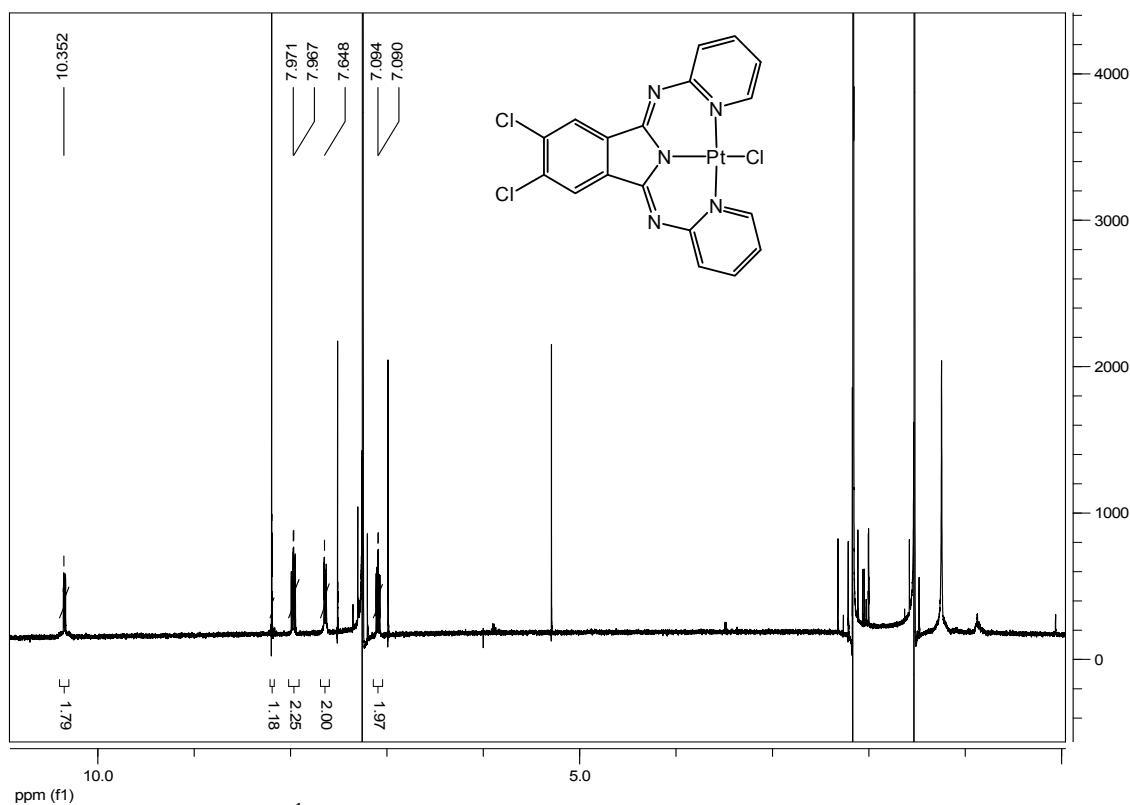

**Figure S30.** 400 MHz  $^1\text{H}$  NMR spectra of **12** ( $\text{CDCl}_3$ ).

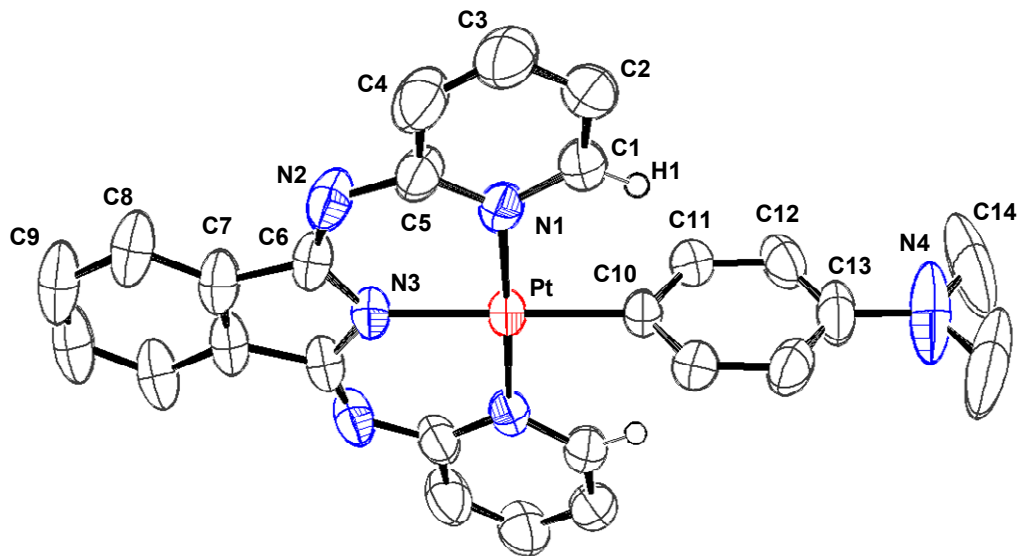

**Figure S31.** ORTEP diagram of **6** with atom labels. Selected hydrogen atoms omitted for clarity.

**Table S2.** Crystal data and structure refinement for **6**.

|                                   |                                                                    |                                |
|-----------------------------------|--------------------------------------------------------------------|--------------------------------|
| Empirical formula                 | $C_{26}H_{22}N_6Pt$                                                |                                |
| Formula weight                    | 613.59                                                             |                                |
| Temperature                       | 296(2) K                                                           |                                |
| Wavelength                        | 0.71073 Å                                                          |                                |
| Crystal system                    | Monoclinic                                                         |                                |
| Space group                       | C 2/c                                                              |                                |
| Unit cell dimensions              | $a = 11.1436(7)$ Å                                                 | $\alpha = 90^\circ$ .          |
|                                   | $b = 23.4283(13)$ Å                                                | $\beta = 115.0110(10)^\circ$ . |
|                                   | $c = 9.3583(6)$ Å                                                  | $\gamma = 90^\circ$ .          |
| Volume                            | $2214.1(2)$ Å <sup>3</sup>                                         |                                |
| Z                                 | 4                                                                  |                                |
| Density (calculated)              | 1.841 Mg/m <sup>3</sup>                                            |                                |
| Absorption coefficient            | 6.365 mm <sup>-1</sup>                                             |                                |
| F(000)                            | 1192                                                               |                                |
| Crystal size                      | 0.29 x 0.17 x 0.10 mm <sup>3</sup>                                 |                                |
| Theta range for data collection   | 2.20 to 30.53°.                                                    |                                |
| Index ranges                      | $-15 \leq h \leq 15$ , $-32 \leq k \leq 33$ , $-13 \leq l \leq 13$ |                                |
| Reflections collected             | 26464                                                              |                                |
| Independent reflections           | 3363 [R(int) = 0.0251]                                             |                                |
| Completeness to theta = 30.53°    | 99.2 %                                                             |                                |
| Absorption correction             | Semi-empirical from equivalents                                    |                                |
| Max. and min. transmission        | 0.54 and 0.46                                                      |                                |
| Refinement method                 | Full-matrix least-squares on F <sup>2</sup>                        |                                |
| Data / restraints / parameters    | 3363 / 0 / 153                                                     |                                |
| Goodness-of-fit on F <sup>2</sup> | 1.143                                                              |                                |
| Final R indices [I > 2σ(I)]       | R1 = 0.0186, wR2 = 0.0427                                          |                                |
| R indices (all data)              | R1 = 0.0221, wR2 = 0.0452                                          |                                |
| Largest diff. peak and hole       | 1.301 and -1.003 e.Å <sup>-3</sup>                                 |                                |

**Table S3.** Atomic coordinates ( $\times 10^4$ ) and equivalent isotropic displacement parameters ( $\text{\AA}^2 \times 10^3$ ) for **6**. U(eq) is defined as one third of the trace of the orthogonalized  $U^{ij}$  tensor.

|       | x       | y       | z       | U(eq)  |
|-------|---------|---------|---------|--------|
| C(1)  | 7150(3) | 6858(1) | 1778(3) | 57(1)  |
| C(2)  | 8125(3) | 6904(1) | 1268(4) | 65(1)  |
| C(3)  | 8550(4) | 6422(1) | 777(5)  | 79(1)  |
| C(4)  | 7998(4) | 5912(1) | 877(5)  | 77(1)  |
| C(5)  | 7021(3) | 5872(1) | 1458(3) | 56(1)  |
| C(6)  | 5780(3) | 5167(1) | 2045(3) | 54(1)  |
| C(7)  | 5470(3) | 4562(1) | 2202(3) | 60(1)  |
| C(8)  | 5956(4) | 4057(1) | 1874(4) | 75(1)  |
| C(9)  | 5460(5) | 3550(1) | 2193(4) | 85(1)  |
| C(10) | 5000    | 7231(1) | 2500    | 45(1)  |
| C(11) | 4269(2) | 7553(1) | 1150(3) | 51(1)  |
| C(12) | 4249(3) | 8146(1) | 1144(4) | 62(1)  |
| C(13) | 5000    | 8457(2) | 2500    | 69(1)  |
| C(14) | 4308(7) | 9362(2) | 1067(8) | 165(3) |
| N(1)  | 6555(2) | 6358(1) | 1870(3) | 48(1)  |
| N(2)  | 6653(3) | 5318(1) | 1558(3) | 63(1)  |
| N(3)  | 5000    | 5497(1) | 2500    | 48(1)  |
| N(4)  | 5000    | 9052(2) | 2500    | 139(3) |
| Pt(1) | 5000    | 6368(1) | 2500    | 43(1)  |

**Table S4.** Bond lengths [Å] and angles [°] for **6**.

---

|               |          |
|---------------|----------|
| C(1)-C(2)     | 1.364(4) |
| C(1)-N(1)     | 1.367(3) |
| C(1)-H(1)     | 0.9300   |
| C(2)-C(3)     | 1.378(4) |
| C(2)-H(2)     | 0.9300   |
| C(3)-C(4)     | 1.365(4) |
| C(3)-H(3)     | 0.9300   |
| C(4)-C(5)     | 1.410(4) |
| C(4)-H(4)     | 0.9300   |
| C(5)-N(1)     | 1.372(3) |
| C(5)-N(2)     | 1.376(3) |
| C(6)-N(2)     | 1.286(3) |
| C(6)-N(3)     | 1.360(3) |
| C(6)-C(7)     | 1.480(3) |
| C(7)-C(7)#1   | 1.381(6) |
| C(7)-C(8)     | 1.388(4) |
| C(8)-C(9)     | 1.395(5) |
| C(8)-H(8)     | 0.9300   |
| C(9)-C(9)#1   | 1.370(9) |
| C(9)-H(9)     | 0.9300   |
| C(10)-C(11)   | 1.400(3) |
| C(10)-C(11)#1 | 1.400(3) |
| C(10)-Pt(1)   | 2.022(3) |
| C(11)-C(12)   | 1.388(4) |
| C(11)-H(11)   | 0.9300   |
| C(12)-C(13)   | 1.394(4) |
| C(12)-H(12)   | 0.9300   |
| C(13)-C(12)#1 | 1.394(4) |
| C(13)-N(4)    | 1.395(5) |
| C(14)-N(4)    | 1.430(6) |
| C(14)-H(14A)  | 0.9600   |
| C(14)-H(14B)  | 0.9600   |
| C(14)-H(14C)  | 0.9600   |
| N(1)-Pt(1)    | 2.053(2) |

|                     |            |
|---------------------|------------|
| N(3)-C(6)#1         | 1.360(3)   |
| N(3)-Pt(1)          | 2.038(3)   |
| N(4)-C(14)#1        | 1.430(6)   |
| Pt(1)-N(1)#1        | 2.053(2)   |
|                     |            |
| C(2)-C(1)-N(1)      | 124.8(3)   |
| C(2)-C(1)-H(1)      | 117.6      |
| N(1)-C(1)-H(1)      | 117.6      |
| C(1)-C(2)-C(3)      | 119.2(3)   |
| C(1)-C(2)-H(2)      | 120.4      |
| C(3)-C(2)-H(2)      | 120.4      |
| C(4)-C(3)-C(2)      | 117.8(3)   |
| C(4)-C(3)-H(3)      | 121.1      |
| C(2)-C(3)-H(3)      | 121.1      |
| C(3)-C(4)-C(5)      | 121.9(3)   |
| C(3)-C(4)-H(4)      | 119.0      |
| C(5)-C(4)-H(4)      | 119.0      |
| N(1)-C(5)-N(2)      | 127.1(2)   |
| N(1)-C(5)-C(4)      | 120.0(2)   |
| N(2)-C(5)-C(4)      | 112.9(2)   |
| N(2)-C(6)-N(3)      | 129.3(2)   |
| N(2)-C(6)-C(7)      | 122.8(2)   |
| N(3)-C(6)-C(7)      | 107.9(2)   |
| C(7)#1-C(7)-C(8)    | 121.53(19) |
| C(7)#1-C(7)-C(6)    | 106.78(15) |
| C(8)-C(7)-C(6)      | 131.7(3)   |
| C(7)-C(8)-C(9)      | 116.9(3)   |
| C(7)-C(8)-H(8)      | 121.6      |
| C(9)-C(8)-H(8)      | 121.6      |
| C(9)#1-C(9)-C(8)    | 121.6(2)   |
| C(9)#1-C(9)-H(9)    | 119.2      |
| C(8)-C(9)-H(9)      | 119.2      |
| C(11)-C(10)-C(11)#1 | 114.7(3)   |
| C(11)-C(10)-Pt(1)   | 122.67(15) |
| C(11)#1-C(10)-Pt(1) | 122.67(15) |
| C(12)-C(11)-C(10)   | 123.1(3)   |

|                     |            |
|---------------------|------------|
| C(12)-C(11)-H(11)   | 118.5      |
| C(10)-C(11)-H(11)   | 118.5      |
| C(11)-C(12)-C(13)   | 121.1(3)   |
| C(11)-C(12)-H(12)   | 119.4      |
| C(13)-C(12)-H(12)   | 119.4      |
| C(12)#1-C(13)-C(12) | 116.9(3)   |
| C(12)#1-C(13)-N(4)  | 121.53(17) |
| C(12)-C(13)-N(4)    | 121.53(17) |
| N(4)-C(14)-H(14A)   | 109.5      |
| N(4)-C(14)-H(14B)   | 109.5      |
| H(14A)-C(14)-H(14B) | 109.5      |
| N(4)-C(14)-H(14C)   | 109.5      |
| H(14A)-C(14)-H(14C) | 109.5      |
| H(14B)-C(14)-H(14C) | 109.5      |
| C(1)-N(1)-C(5)      | 116.2(2)   |
| C(1)-N(1)-Pt(1)     | 119.94(16) |
| C(5)-N(1)-Pt(1)     | 123.82(17) |
| C(6)-N(2)-C(5)      | 125.1(2)   |
| C(6)-N(3)-C(6)#1    | 110.5(3)   |
| C(6)-N(3)-Pt(1)     | 124.73(14) |
| C(6)#1-N(3)-Pt(1)   | 124.73(14) |
| C(13)-N(4)-C(14)    | 120.5(3)   |
| C(13)-N(4)-C(14)#1  | 120.5(3)   |
| C(14)-N(4)-C(14)#1  | 119.0(6)   |
| C(10)-Pt(1)-N(3)    | 180.0      |
| C(10)-Pt(1)-N(1)    | 90.66(5)   |
| N(3)-Pt(1)-N(1)     | 89.34(5)   |
| C(10)-Pt(1)-N(1)#1  | 90.66(5)   |
| N(3)-Pt(1)-N(1)#1   | 89.34(5)   |
| N(1)-Pt(1)-N(1)#1   | 178.68(10) |

---

Symmetry transformations used to generate equivalent atoms:

#1 -x+1,y,-z+1/2



**Table S5.** Anisotropic displacement parameters ( $\text{\AA}^2 \times 10^3$ ) for **6**. The anisotropic displacement factor exponent takes the form:  $-2\pi^2 [ h^2 a^{*2}U^{11} + \dots + 2 h k a^* b^* U^{12} ]$

|       | U <sup>11</sup> | U <sup>22</sup> | U <sup>33</sup> | U <sup>23</sup> | U <sup>13</sup> | U <sup>12</sup> |
|-------|-----------------|-----------------|-----------------|-----------------|-----------------|-----------------|
| C(1)  | 53(1)           | 45(1)           | 76(2)           | 1(1)            | 30(1)           | -1(1)           |
| C(2)  | 56(1)           | 58(2)           | 86(2)           | 8(1)            | 34(1)           | -2(1)           |
| C(3)  | 73(2)           | 73(2)           | 113(3)          | 13(2)           | 61(2)           | 11(2)           |
| C(4)  | 83(2)           | 59(2)           | 112(3)          | 10(2)           | 63(2)           | 18(2)           |
| C(5)  | 60(1)           | 45(1)           | 69(2)           | 11(1)           | 32(1)           | 12(1)           |
| C(6)  | 73(2)           | 34(1)           | 56(1)           | 5(1)            | 30(1)           | 8(1)            |
| C(7)  | 92(2)           | 34(1)           | 54(1)           | 4(1)            | 32(1)           | 5(1)            |
| C(8)  | 120(3)          | 40(1)           | 72(2)           | 5(1)            | 49(2)           | 17(2)           |
| C(9)  | 151(4)          | 36(1)           | 71(2)           | 1(1)            | 48(2)           | 13(2)           |
| C(10) | 47(2)           | 32(1)           | 57(2)           | 0               | 23(1)           | 0               |
| C(11) | 50(1)           | 44(1)           | 58(1)           | 3(1)            | 20(1)           | 1(1)            |
| C(12) | 67(2)           | 46(1)           | 80(2)           | 20(1)           | 38(1)           | 14(1)           |
| C(13) | 89(3)           | 32(2)           | 112(4)          | 0               | 68(3)           | 0               |
| C(14) | 252(8)          | 51(2)           | 268(8)          | 60(3)           | 184(7)          | 60(3)           |
| N(1)  | 49(1)           | 39(1)           | 56(1)           | 5(1)            | 22(1)           | 5(1)            |
| N(2)  | 81(2)           | 40(1)           | 79(2)           | 10(1)           | 45(1)           | 16(1)           |
| N(3)  | 59(2)           | 31(1)           | 55(2)           | 0               | 26(1)           | 0               |
| N(4)  | 226(8)          | 35(2)           | 173(6)          | 0               | 102(6)          | 0               |
| Pt(1) | 47(1)           | 31(1)           | 51(1)           | 0               | 20(1)           | 0               |

**Table S6.** Hydrogen coordinates ( $\times 10^4$ ) and isotropic displacement parameters ( $\text{\AA}^2 \times 10^3$ ) for **6**.

|        | x    | y    | z    | U(eq) |
|--------|------|------|------|-------|
| H(1)   | 6869 | 7190 | 2086 | 68    |
| H(2)   | 8499 | 7258 | 1251 | 78    |
| H(3)   | 9193 | 6442 | 390  | 95    |
| H(4)   | 8273 | 5581 | 553  | 93    |
| H(8)   | 6582 | 4057 | 1460 | 90    |
| H(9)   | 5760 | 3204 | 1984 | 102   |
| H(11)  | 3774 | 7362 | 214  | 62    |
| H(12)  | 3725 | 8338 | 221  | 74    |
| H(14A) | 4413 | 9171 | 219  | 247   |
| H(14B) | 4663 | 9741 | 1179 | 247   |
| H(14C) | 3385 | 9382 | 841  | 247   |
